# Supplementary material for: Deep learning approach for quantification of organelles and misfolded polypeptide delivery within degradative compartments
Source: PubMed Central journal article supplement — Mol Biol Cell. 2020 Jul 1;31(14):1512–24. doi: 10.1091/mbc.E20-04-0269 (PMC7359569; doi:10.1091/mbc.e20-04-0269), 2020-07-01

# Supplemental Materials

*Molecular Biology of the Cell*

Morone et al.

## Supplementary Figure 1

**Limitations of standard segmentation approaches, raw output data.** **A)** CLSM image where LAMP1 decorates the limiting membrane of EL and its inset. Output of common segmentation approaches: **B)** Automatic IsoData thresholding followed by watershed segmentation; **C)** random forest machine learning with iLastik; **D)** support vector machine (SVM); **E)** Trainable Weka segmentation; **F)** Squassh region competition segmentation; **G)** Icy spot detection plugin; **H)** cmeAnalysis; **I)** Interaction Analysis ImageJ plugin; **J)** Colocalisation Pipeline ImageJ plugin; **K)** Circular Hough transform (CHT); **L)** Stardist star-convex polygons ImageJ plugin.

## Supplementary Figure 2

**A)** Segmentation output of a 2D 5-resolution levels with 64 base channels U-Net network as reported in (Falk et al., 2019). For the loaded- (magenta) and empty-EL (cyan) classes, false negatives (yellow) and false positives (blue) are highlighted. **B-E)** Computational performance. After  $6 \times 10^4$  iterations, the intersection over union (**B**) is  $0.722 \pm 0.176$  and  $0.686 \pm 0.093$  for empty and loaded EL classes respectively (average  $\pm$  SD of three validation images). ROC curves (**C**) for both classes show an Area Under Curve of 98.40% and 99.83% for empty and loaded EL respectively.  $F_1$  scores for segmentation task (**D**) resulted in  $0.361 \pm 0.211$  and  $0.404 \pm 0.215$  for empty and loaded EL, while  $F_1$  scores for detection (**E**) task  $0.323 \pm 0.104$  and  $0.370 \pm 0.132$  respectively.

### Supplementary Figure 3

Same as **Fig. 4** in images with different magnifications (expressed as pixel size). SEC62-HA- or SEC62LIR-HA-positive MEF were acquired using a 63x objective while keeping the same number of total pixels and changing magnification (4.5x (pixel size 0.107  $\mu\text{m}$ ), 4x (0.120  $\mu\text{m}$ ), 3.5x (0.138  $\mu\text{m}$ ), 3x (0.160  $\mu\text{m}$ ), 2.5x (0.193  $\mu\text{m}$ ), 2x (0.241  $\mu\text{m}$ ), 1.5x (0.321  $\mu\text{m}$ ) and 1x (0.481  $\mu\text{m}$ )). The images were quantified using LysoQuant and the following parameters were analyzed: **A)** percentage of SEC62-positive EL, **B)** total EL and **C)** time required for the quantification of one image in SEC62-HA-positive MEF cells.

### **Supplementary Figure 4**

Automatic thresholding algorithms output and their performance evaluated as F1 score for segmentation and Intersection over Union (IoU) in decreasing order of performance.

### **Supplementary Table 1**

Circular Hough Transform output performance, evaluated as F1 score for segmentation and Intersection over Union (IoU) as a function of algorithm method, sensitivity and edge threshold parameters.

## Circular Hough Transform (CHT) Analysis

CHT was conducted on MATLAB R2019a with bright object polarity and the Method, Sensitivity and EdgeThreshold parameters specified in the 1st column below. The resulting images were then compared with manual segmentation to measure True Negatives (TN), False Negatives (FN), False Positives (FP), True Positives (TP) and calculate Precision (P), Recall F1 score (F1) and Intersection over Union (IoU)

| CHT [Method] [Sensitivity] [EdgeThreshold].tif | TN     | FN     | FP | TP | P | R | F1 | IoU |
|------------------------------------------------|--------|--------|----|----|---|---|----|-----|
| cht_Phasecode_0.05_0.05.tif                    | 803363 | 120158 | 0  | 0  | 0 | 0 | 0  | 0   |
| cht_Phasecode_0.05_0.10.tif                    | 803363 | 120158 | 0  | 0  | 0 | 0 | 0  | 0   |
| cht_Phasecode_0.05_0.15.tif                    | 803363 | 120158 | 0  | 0  | 0 | 0 | 0  | 0   |
| cht_Phasecode_0.05_0.20.tif                    | 803363 | 120158 | 0  | 0  | 0 | 0 | 0  | 0   |
| cht_Phasecode_0.05_0.25.tif                    | 803363 | 120158 | 0  | 0  | 0 | 0 | 0  | 0   |
| cht_Phasecode_0.05_0.30.tif                    | 803363 | 120158 | 0  | 0  | 0 | 0 | 0  | 0   |
| cht_Phasecode_0.05_0.35.tif                    | 803363 | 120158 | 0  | 0  | 0 | 0 | 0  | 0   |
| cht_Phasecode_0.05_0.40.tif                    | 803363 | 120158 | 0  | 0  | 0 | 0 | 0  | 0   |
| cht_Phasecode_0.05_0.45.tif                    | 803363 | 120158 | 0  | 0  | 0 | 0 | 0  | 0   |
| cht_Phasecode_0.05_0.50.tif                    | 803363 | 120158 | 0  | 0  | 0 | 0 | 0  | 0   |
| cht_Phasecode_0.05_0.55.tif                    | 803363 | 120158 | 0  | 0  | 0 | 0 | 0  | 0   |
| cht_Phasecode_0.05_0.60.tif                    | 803363 | 120158 | 0  | 0  | 0 | 0 | 0  | 0   |
| cht_Phasecode_0.05_0.65.tif                    | 803363 | 120158 | 0  | 0  | 0 | 0 | 0  | 0   |
| cht_Phasecode_0.05_0.70.tif                    | 803363 | 120158 | 0  | 0  | 0 | 0 | 0  | 0   |
| cht_Phasecode_0.05_0.75.tif                    | 803363 | 120158 | 0  | 0  | 0 | 0 | 0  | 0   |
| cht_Phasecode_0.05_0.80.tif                    | 803363 | 120158 | 0  | 0  | 0 | 0 | 0  | 0   |
| cht_Phasecode_0.05_0.85.tif                    | 803363 | 120158 | 0  | 0  | 0 | 0 | 0  | 0   |
| cht_Phasecode_0.05_0.90.tif                    | 803363 | 120158 | 0  | 0  | 0 | 0 | 0  | 0   |
| cht_Phasecode_0.05_0.95.tif                    | 803363 | 120158 | 0  | 0  | 0 | 0 | 0  | 0   |
| cht_Phasecode_0.05_1.00.tif                    | 803363 | 120158 | 0  | 0  | 0 | 0 | 0  | 0   |
| cht_Phasecode_0.10_0.05.tif                    | 803363 | 120158 | 0  | 0  | 0 | 0 | 0  | 0   |
| cht_Phasecode_0.10_0.10.tif                    | 803363 | 120158 | 0  | 0  | 0 | 0 | 0  | 0   |
| cht_Phasecode_0.10_0.15.tif                    | 803363 | 120158 | 0  | 0  | 0 | 0 | 0  | 0   |
| cht_Phasecode_0.10_0.20.tif                    | 803363 | 120158 | 0  | 0  | 0 | 0 | 0  | 0   |
| cht_Phasecode_0.10_0.25.tif                    | 803363 | 120158 | 0  | 0  | 0 | 0 | 0  | 0   |
| cht_Phasecode_0.10_0.30.tif                    | 803363 | 120158 | 0  | 0  | 0 | 0 | 0  | 0   |
| cht_Phasecode_0.10_0.35.tif                    | 803363 | 120158 | 0  | 0  | 0 | 0 | 0  | 0   |
| cht_Phasecode_0.10_0.40.tif                    | 803363 | 120158 | 0  | 0  | 0 | 0 | 0  | 0   |
| cht_Phasecode_0.10_0.45.tif                    | 803363 | 120158 | 0  | 0  | 0 | 0 | 0  | 0   |
| cht_Phasecode_0.10_0.50.tif                    | 803363 | 120158 | 0  | 0  | 0 | 0 | 0  | 0   |
| cht_Phasecode_0.10_0.55.tif                    | 803363 | 120158 | 0  | 0  | 0 | 0 | 0  | 0   |
| cht_Phasecode_0.10_0.60.tif                    | 803363 | 120158 | 0  | 0  | 0 | 0 | 0  | 0   |
| cht_Phasecode_0.10_0.65.tif                    | 803363 | 120158 | 0  | 0  | 0 | 0 | 0  | 0   |
| cht_Phasecode_0.10_0.70.tif                    | 803363 | 120158 | 0  | 0  | 0 | 0 | 0  | 0   |
| cht_Phasecode_0.10_0.75.tif                    | 803363 | 120158 | 0  | 0  | 0 | 0 | 0  | 0   |
| cht_Phasecode_0.10_0.80.tif                    | 803363 | 120158 | 0  | 0  | 0 | 0 | 0  | 0   |
| cht_Phasecode_0.10_0.85.tif                    | 803363 | 120158 | 0  | 0  | 0 | 0 | 0  | 0   |
| cht_Phasecode_0.10_0.90.tif                    | 803363 | 120158 | 0  | 0  | 0 | 0 | 0  | 0   |
| cht_Phasecode_0.10_0.95.tif                    | 803363 | 120158 | 0  | 0  | 0 | 0 | 0  | 0   |
| cht_Phasecode_0.10_1.00.tif                    | 803363 | 120158 | 0  | 0  | 0 | 0 | 0  | 0   |
| cht_Phasecode_0.15_0.05.tif                    | 803363 | 120158 | 0  | 0  | 0 | 0 | 0  | 0   |
| cht_Phasecode_0.15_0.10.tif                    | 803363 | 120158 | 0  | 0  | 0 | 0 | 0  | 0   |
| cht_Phasecode_0.15_0.15.tif                    | 803363 | 120158 | 0  | 0  | 0 | 0 | 0  | 0   |
| cht_Phasecode_0.15_0.20.tif                    | 803363 | 120158 | 0  | 0  | 0 | 0 | 0  | 0   |
| cht_Phasecode_0.15_0.25.tif                    | 803363 | 120158 | 0  | 0  | 0 | 0 | 0  | 0   |
| cht_Phasecode_0.15_0.30.tif                    | 803363 | 120158 | 0  | 0  | 0 | 0 | 0  | 0   |
| cht_Phasecode_0.15_0.35.tif                    | 803363 | 120158 | 0  | 0  | 0 | 0 | 0  | 0   |
| cht_Phasecode_0.15_0.40.tif                    | 803363 | 120158 | 0  | 0  | 0 | 0 | 0  | 0   |
| cht_Phasecode_0.15_0.45.tif                    | 803363 | 120158 | 0  | 0  | 0 | 0 | 0  | 0   |
| cht_Phasecode_0.15_0.50.tif                    | 803363 | 120158 | 0  | 0  | 0 | 0 | 0  | 0   |
| cht_Phasecode_0.15_0.55.tif                    | 803363 | 120158 | 0  | 0  | 0 | 0 | 0  | 0   |
| cht_Phasecode_0.15_0.60.tif                    | 803363 | 120158 | 0  | 0  | 0 | 0 | 0  | 0   |
| cht_Phasecode_0.15_0.65.tif                    | 803363 | 120158 | 0  | 0  | 0 | 0 | 0  | 0   |
| cht_Phasecode_0.15_0.70.tif                    | 803363 | 120158 | 0  | 0  | 0 | 0 | 0  | 0   |
| cht_Phasecode_0.15_0.75.tif                    | 803363 | 120158 | 0  | 0  | 0 | 0 | 0  | 0   |
| cht_Phasecode_0.15_0.80.tif                    | 803363 | 120158 | 0  | 0  | 0 | 0 | 0  | 0   |
| cht_Phasecode_0.15_0.85.tif                    | 803363 | 120158 | 0  | 0  | 0 | 0 | 0  | 0   |
| cht_Phasecode_0.15_0.90.tif                    | 803363 | 120158 | 0  | 0  | 0 | 0 | 0  | 0   |
| cht_Phasecode_0.15_0.95.tif                    | 803363 | 120158 | 0  | 0  | 0 | 0 | 0  | 0   |
| cht_Phasecode_0.15_1.00.tif                    | 803363 | 120158 | 0  | 0  | 0 | 0 | 0  | 0   |
| cht_Phasecode_0.20_0.05.tif                    | 803363 | 120158 | 0  | 0  | 0 | 0 | 0  | 0   |
| cht_Phasecode_0.20_0.10.tif                    | 803363 | 120158 | 0  | 0  | 0 | 0 | 0  | 0   |
| cht_Phasecode_0.20_0.15.tif                    | 803363 | 120158 | 0  | 0  | 0 | 0 | 0  | 0   |
| cht_Phasecode_0.20_0.20.tif                    | 803363 | 120158 | 0  | 0  | 0 | 0 | 0  | 0   |
| cht_Phasecode_0.20_0.25.tif                    | 803363 | 120158 | 0  | 0  | 0 | 0 | 0  | 0   |
| cht_Phasecode_0.20_0.30.tif                    | 803363 | 120158 | 0  | 0  | 0 | 0 | 0  | 0   |
| cht_Phasecode_0.20_0.35.tif                    | 803363 | 120158 | 0  | 0  | 0 | 0 | 0  | 0   |
| cht_Phasecode_0.20_0.40.tif                    | 803363 | 120158 | 0  | 0  | 0 | 0 | 0  | 0   |
| cht_Phasecode_0.20_0.45.tif                    | 803363 | 120158 | 0  | 0  | 0 | 0 | 0  | 0   |
| cht_Phasecode_0.20_0.50.tif                    | 803363 | 120158 | 0  | 0  | 0 | 0 | 0  | 0   |





|                             |        |        |      |      |          |          |          |          |   |
|-----------------------------|--------|--------|------|------|----------|----------|----------|----------|---|
| cht_Phasecode_0.40_0.55.tif | 803363 | 120158 | 0    | 0    | 0        | 0        | 0        | 0        | 0 |
| cht_Phasecode_0.40_0.60.tif | 803363 | 120158 | 0    | 0    | 0        | 0        | 0        | 0        | 0 |
| cht_Phasecode_0.40_0.65.tif | 803363 | 120158 | 0    | 0    | 0        | 0        | 0        | 0        | 0 |
| cht_Phasecode_0.40_0.70.tif | 803363 | 120158 | 0    | 0    | 0        | 0        | 0        | 0        | 0 |
| cht_Phasecode_0.40_0.75.tif | 803363 | 120158 | 0    | 0    | 0        | 0        | 0        | 0        | 0 |
| cht_Phasecode_0.40_0.80.tif | 803363 | 120158 | 0    | 0    | 0        | 0        | 0        | 0        | 0 |
| cht_Phasecode_0.40_0.85.tif | 803363 | 120158 | 0    | 0    | 0        | 0        | 0        | 0        | 0 |
| cht_Phasecode_0.40_0.90.tif | 803363 | 120158 | 0    | 0    | 0        | 0        | 0        | 0        | 0 |
| cht_Phasecode_0.40_0.95.tif | 803363 | 120158 | 0    | 0    | 0        | 0        | 0        | 0        | 0 |
| cht_Phasecode_0.40_1.00.tif | 803363 | 120158 | 0    | 0    | 0        | 0        | 0        | 0        | 0 |
| cht_Phasecode_0.45_0.05.tif | 803054 | 119388 | 309  | 770  | 0.713624 | 0.006408 | 0.012702 | 0.006392 |   |
| cht_Phasecode_0.45_0.10.tif | 803079 | 119323 | 284  | 835  | 0.746202 | 0.006949 | 0.01377  | 0.006933 |   |
| cht_Phasecode_0.45_0.15.tif | 803138 | 119502 | 225  | 656  | 0.744608 | 0.005459 | 0.010839 | 0.005449 |   |
| cht_Phasecode_0.45_0.20.tif | 803225 | 119567 | 138  | 591  | 0.8107   | 0.004919 | 0.009778 | 0.004913 |   |
| cht_Phasecode_0.45_0.25.tif | 803363 | 120011 | 0    | 147  | 1        | 0.001223 | 0.002444 | 0.001223 |   |
| cht_Phasecode_0.45_0.30.tif | 803363 | 120158 | 0    | 0    | 0        | 0        | 0        | 0        | 0 |
| cht_Phasecode_0.45_0.35.tif | 803363 | 120158 | 0    | 0    | 0        | 0        | 0        | 0        | 0 |
| cht_Phasecode_0.45_0.40.tif | 803363 | 120158 | 0    | 0    | 0        | 0        | 0        | 0        | 0 |
| cht_Phasecode_0.45_0.45.tif | 803363 | 120158 | 0    | 0    | 0        | 0        | 0        | 0        | 0 |
| cht_Phasecode_0.45_0.50.tif | 803363 | 120158 | 0    | 0    | 0        | 0        | 0        | 0        | 0 |
| cht_Phasecode_0.45_0.55.tif | 803363 | 120158 | 0    | 0    | 0        | 0        | 0        | 0        | 0 |
| cht_Phasecode_0.45_0.60.tif | 803363 | 120158 | 0    | 0    | 0        | 0        | 0        | 0        | 0 |
| cht_Phasecode_0.45_0.65.tif | 803363 | 120158 | 0    | 0    | 0        | 0        | 0        | 0        | 0 |
| cht_Phasecode_0.45_0.70.tif | 803363 | 120158 | 0    | 0    | 0        | 0        | 0        | 0        | 0 |
| cht_Phasecode_0.45_0.75.tif | 803363 | 120158 | 0    | 0    | 0        | 0        | 0        | 0        | 0 |
| cht_Phasecode_0.45_0.80.tif | 803363 | 120158 | 0    | 0    | 0        | 0        | 0        | 0        | 0 |
| cht_Phasecode_0.45_0.85.tif | 803363 | 120158 | 0    | 0    | 0        | 0        | 0        | 0        | 0 |
| cht_Phasecode_0.45_0.90.tif | 803363 | 120158 | 0    | 0    | 0        | 0        | 0        | 0        | 0 |
| cht_Phasecode_0.45_0.95.tif | 803363 | 120158 | 0    | 0    | 0        | 0        | 0        | 0        | 0 |
| cht_Phasecode_0.45_1.00.tif | 803363 | 120158 | 0    | 0    | 0        | 0        | 0        | 0        | 0 |
| cht_Phasecode_0.50_0.05.tif | 802657 | 118501 | 706  | 1657 | 0.701227 | 0.01379  | 0.027048 | 0.01371  |   |
| cht_Phasecode_0.50_0.10.tif | 802931 | 118553 | 432  | 1605 | 0.787923 | 0.013357 | 0.026269 | 0.01331  |   |
| cht_Phasecode_0.50_0.15.tif | 803037 | 118913 | 326  | 1245 | 0.792489 | 0.010361 | 0.020455 | 0.010333 |   |
| cht_Phasecode_0.50_0.20.tif | 803091 | 118823 | 272  | 1335 | 0.830741 | 0.01111  | 0.021927 | 0.011085 |   |
| cht_Phasecode_0.50_0.25.tif | 803247 | 119371 | 116  | 787  | 0.871539 | 0.00655  | 0.013002 | 0.006543 |   |
| cht_Phasecode_0.50_0.30.tif | 803320 | 119648 | 43   | 510  | 0.922242 | 0.004244 | 0.00845  | 0.004243 |   |
| cht_Phasecode_0.50_0.35.tif | 803325 | 119806 | 38   | 352  | 0.902564 | 0.002929 | 0.00584  | 0.002929 |   |
| cht_Phasecode_0.50_0.40.tif | 803363 | 120158 | 0    | 0    | 0        | 0        | 0        | 0        | 0 |
| cht_Phasecode_0.50_0.45.tif | 803363 | 120158 | 0    | 0    | 0        | 0        | 0        | 0        | 0 |
| cht_Phasecode_0.50_0.50.tif | 803363 | 120158 | 0    | 0    | 0        | 0        | 0        | 0        | 0 |
| cht_Phasecode_0.50_0.55.tif | 803363 | 120158 | 0    | 0    | 0        | 0        | 0        | 0        | 0 |
| cht_Phasecode_0.50_0.60.tif | 803363 | 120158 | 0    | 0    | 0        | 0        | 0        | 0        | 0 |
| cht_Phasecode_0.50_0.65.tif | 803363 | 120158 | 0    | 0    | 0        | 0        | 0        | 0        | 0 |
| cht_Phasecode_0.50_0.70.tif | 803363 | 120158 | 0    | 0    | 0        | 0        | 0        | 0        | 0 |
| cht_Phasecode_0.50_0.75.tif | 803363 | 120158 | 0    | 0    | 0        | 0        | 0        | 0        | 0 |
| cht_Phasecode_0.50_0.80.tif | 803363 | 120158 | 0    | 0    | 0        | 0        | 0        | 0        | 0 |
| cht_Phasecode_0.50_0.85.tif | 803363 | 120158 | 0    | 0    | 0        | 0        | 0        | 0        | 0 |
| cht_Phasecode_0.50_0.90.tif | 803363 | 120158 | 0    | 0    | 0        | 0        | 0        | 0        | 0 |
| cht_Phasecode_0.50_0.95.tif | 803363 | 120158 | 0    | 0    | 0        | 0        | 0        | 0        | 0 |
| cht_Phasecode_0.50_1.00.tif | 803363 | 120158 | 0    | 0    | 0        | 0        | 0        | 0        | 0 |
| cht_Phasecode_0.55_0.05.tif | 801876 | 116803 | 1487 | 3355 | 0.692895 | 0.027922 | 0.05368  | 0.02758  |   |
| cht_Phasecode_0.55_0.10.tif | 801972 | 116710 | 1391 | 3448 | 0.712544 | 0.028696 | 0.055169 | 0.028367 |   |
| cht_Phasecode_0.55_0.15.tif | 802666 | 117219 | 697  | 2939 | 0.808306 | 0.024459 | 0.047482 | 0.024318 |   |
| cht_Phasecode_0.55_0.20.tif | 802918 | 117537 | 445  | 2621 | 0.85486  | 0.021813 | 0.04254  | 0.021732 |   |
| cht_Phasecode_0.55_0.25.tif | 803175 | 118549 | 188  | 1609 | 0.895381 | 0.013391 | 0.026387 | 0.01337  |   |
| cht_Phasecode_0.55_0.30.tif | 803275 | 119289 | 88   | 869  | 0.908046 | 0.007232 | 0.01435  | 0.007227 |   |
| cht_Phasecode_0.55_0.35.tif | 803299 | 119631 | 64   | 527  | 0.891709 | 0.004386 | 0.008729 | 0.004384 |   |
| cht_Phasecode_0.55_0.40.tif | 803343 | 119981 | 20   | 177  | 0.898477 | 0.001473 | 0.002941 | 0.001473 |   |
| cht_Phasecode_0.55_0.45.tif | 803330 | 119980 | 33   | 178  | 0.843602 | 0.001481 | 0.002958 | 0.001481 |   |
| cht_Phasecode_0.55_0.50.tif | 803363 | 120158 | 0    | 0    | 0        | 0        | 0        | 0        | 0 |
| cht_Phasecode_0.55_0.55.tif | 803363 | 120158 | 0    | 0    | 0        | 0        | 0        | 0        | 0 |
| cht_Phasecode_0.55_0.60.tif | 803363 | 120158 | 0    | 0    | 0        | 0        | 0        | 0        | 0 |
| cht_Phasecode_0.55_0.65.tif | 803363 | 120158 | 0    | 0    | 0        | 0        | 0        | 0        | 0 |
| cht_Phasecode_0.55_0.70.tif | 803363 | 120158 | 0    | 0    | 0        | 0        | 0        | 0        | 0 |
| cht_Phasecode_0.55_0.75.tif | 803363 | 120158 | 0    | 0    | 0        | 0        | 0        | 0        | 0 |
| cht_Phasecode_0.55_0.80.tif | 803363 | 120158 | 0    | 0    | 0        | 0        | 0        | 0        | 0 |
| cht_Phasecode_0.55_0.85.tif | 803363 | 120158 | 0    | 0    | 0        | 0        | 0        | 0        | 0 |
| cht_Phasecode_0.55_0.90.tif | 803363 | 120158 | 0    | 0    | 0        | 0        | 0        | 0        | 0 |
| cht_Phasecode_0.55_0.95.tif | 803363 | 120158 | 0    | 0    | 0        | 0        | 0        | 0        | 0 |
| cht_Phasecode_0.55_1.00.tif | 803363 | 120158 | 0    | 0    | 0        | 0        | 0        | 0        | 0 |
| cht_Phasecode_0.60_0.05.tif | 800071 | 112379 | 3292 | 7779 | 0.702647 | 0.06474  | 0.118556 | 0.063013 |   |
| cht_Phasecode_0.60_0.10.tif | 800903 | 112442 | 2460 | 7716 | 0.758255 | 0.064215 | 0.118403 | 0.062927 |   |
| cht_Phasecode_0.60_0.15.tif | 801923 | 113337 | 1440 | 6821 | 0.825687 | 0.056767 | 0.10623  | 0.056095 |   |
| cht_Phasecode_0.60_0.20.tif | 802667 | 115700 | 696  | 4458 | 0.864959 | 0.037101 | 0.07115  | 0.036887 |   |
| cht_Phasecode_0.60_0.25.tif | 802974 | 117327 | 389  | 2831 | 0.879193 | 0.023561 | 0.045891 | 0.023485 |   |
| cht_Phasecode_0.60_0.30.tif | 803158 | 118343 | 205  | 1815 | 0.898515 | 0.015105 | 0.029711 | 0.015079 |   |
| cht_Phasecode_0.60_0.35.tif | 803285 | 119345 | 78   | 813  | 0.912458 | 0.006766 | 0.013433 | 0.006762 |   |
| cht_Phasecode_0.60_0.40.tif | 803310 | 119629 | 53   | 529  | 0.908935 | 0.004403 | 0.008763 | 0.004401 |   |
| cht_Phasecode_0.60_0.45.tif | 803324 | 119980 | 39   | 178  | 0.820276 | 0.001481 | 0.002957 | 0.001481 |   |
| cht_Phasecode_0.60_0.50.tif | 803324 | 119980 | 39   | 178  | 0.820276 | 0.001481 | 0.002957 | 0.001481 |   |

|                             |        |        |       |       |          |          |          |          |   |
|-----------------------------|--------|--------|-------|-------|----------|----------|----------|----------|---|
| cht_Phasecode_0.60_0.55.tif | 803363 | 120158 | 0     | 0     | 0        | 0        | 0        | 0        | 0 |
| cht_Phasecode_0.60_0.60.tif | 803363 | 120158 | 0     | 0     | 0        | 0        | 0        | 0        | 0 |
| cht_Phasecode_0.60_0.65.tif | 803363 | 120158 | 0     | 0     | 0        | 0        | 0        | 0        | 0 |
| cht_Phasecode_0.60_0.70.tif | 803363 | 120158 | 0     | 0     | 0        | 0        | 0        | 0        | 0 |
| cht_Phasecode_0.60_0.75.tif | 803363 | 120158 | 0     | 0     | 0        | 0        | 0        | 0        | 0 |
| cht_Phasecode_0.60_0.80.tif | 803363 | 120158 | 0     | 0     | 0        | 0        | 0        | 0        | 0 |
| cht_Phasecode_0.60_0.85.tif | 803363 | 120158 | 0     | 0     | 0        | 0        | 0        | 0        | 0 |
| cht_Phasecode_0.60_0.90.tif | 803363 | 120158 | 0     | 0     | 0        | 0        | 0        | 0        | 0 |
| cht_Phasecode_0.60_0.95.tif | 803363 | 120158 | 0     | 0     | 0        | 0        | 0        | 0        | 0 |
| cht_Phasecode_0.60_1.00.tif | 803363 | 120158 | 0     | 0     | 0        | 0        | 0        | 0        | 0 |
| cht_Phasecode_0.65_0.05.tif | 797200 | 104618 | 6163  | 15540 | 0.71603  | 0.12933  | 0.219088 | 0.12302  |   |
| cht_Phasecode_0.65_0.10.tif | 798972 | 104873 | 4391  | 15285 | 0.776835 | 0.127208 | 0.218616 | 0.122723 |   |
| cht_Phasecode_0.65_0.15.tif | 800246 | 106662 | 3117  | 13496 | 0.812376 | 0.112319 | 0.197352 | 0.109479 |   |
| cht_Phasecode_0.65_0.20.tif | 801435 | 108881 | 1928  | 11277 | 0.853995 | 0.093851 | 0.169117 | 0.092369 |   |
| cht_Phasecode_0.65_0.25.tif | 802492 | 113204 | 871   | 6954  | 0.88869  | 0.057874 | 0.108671 | 0.057457 |   |
| cht_Phasecode_0.65_0.30.tif | 802956 | 116514 | 407   | 3644  | 0.899531 | 0.030327 | 0.058675 | 0.030224 |   |
| cht_Phasecode_0.65_0.35.tif | 803158 | 117585 | 205   | 2573  | 0.926206 | 0.021413 | 0.041859 | 0.021377 |   |
| cht_Phasecode_0.65_0.40.tif | 803261 | 119223 | 102   | 935   | 0.901639 | 0.007781 | 0.01543  | 0.007775 |   |
| cht_Phasecode_0.65_0.45.tif | 803320 | 119815 | 43    | 343   | 0.888601 | 0.002855 | 0.005691 | 0.002854 |   |
| cht_Phasecode_0.65_0.50.tif | 803320 | 119980 | 43    | 178   | 0.80543  | 0.001481 | 0.002957 | 0.001481 |   |
| cht_Phasecode_0.65_0.55.tif | 803363 | 120158 | 0     | 0     | 0        | 0        | 0        | 0        | 0 |
| cht_Phasecode_0.65_0.60.tif | 803363 | 120158 | 0     | 0     | 0        | 0        | 0        | 0        | 0 |
| cht_Phasecode_0.65_0.65.tif | 803363 | 120158 | 0     | 0     | 0        | 0        | 0        | 0        | 0 |
| cht_Phasecode_0.65_0.70.tif | 803363 | 120158 | 0     | 0     | 0        | 0        | 0        | 0        | 0 |
| cht_Phasecode_0.65_0.75.tif | 803363 | 120158 | 0     | 0     | 0        | 0        | 0        | 0        | 0 |
| cht_Phasecode_0.65_0.80.tif | 803363 | 120158 | 0     | 0     | 0        | 0        | 0        | 0        | 0 |
| cht_Phasecode_0.65_0.85.tif | 803363 | 120158 | 0     | 0     | 0        | 0        | 0        | 0        | 0 |
| cht_Phasecode_0.65_0.90.tif | 803363 | 120158 | 0     | 0     | 0        | 0        | 0        | 0        | 0 |
| cht_Phasecode_0.65_0.95.tif | 803363 | 120158 | 0     | 0     | 0        | 0        | 0        | 0        | 0 |
| cht_Phasecode_0.65_1.00.tif | 803363 | 120158 | 0     | 0     | 0        | 0        | 0        | 0        | 0 |
| cht_Phasecode_0.70_0.05.tif | 791380 | 89743  | 11983 | 30415 | 0.717369 | 0.253125 | 0.37421  | 0.230171 |   |
| cht_Phasecode_0.70_0.10.tif | 794929 | 92296  | 8434  | 27862 | 0.767633 | 0.231878 | 0.356169 | 0.21667  |   |
| cht_Phasecode_0.70_0.15.tif | 797482 | 96051  | 5881  | 24107 | 0.803888 | 0.200628 | 0.321114 | 0.191266 |   |
| cht_Phasecode_0.70_0.20.tif | 799546 | 99795  | 3817  | 20363 | 0.842142 | 0.169469 | 0.282157 | 0.164251 |   |
| cht_Phasecode_0.70_0.25.tif | 801470 | 107054 | 1893  | 13104 | 0.873775 | 0.109056 | 0.193911 | 0.107365 |   |
| cht_Phasecode_0.70_0.30.tif | 802636 | 113598 | 727   | 6560  | 0.900233 | 0.054595 | 0.102946 | 0.054266 |   |
| cht_Phasecode_0.70_0.35.tif | 802936 | 116201 | 427   | 3957  | 0.9026   | 0.032932 | 0.063545 | 0.032815 |   |
| cht_Phasecode_0.70_0.40.tif | 803156 | 118167 | 207   | 1991  | 0.905823 | 0.01657  | 0.032544 | 0.016541 |   |
| cht_Phasecode_0.70_0.45.tif | 803196 | 118971 | 167   | 1187  | 0.876662 | 0.009879 | 0.019537 | 0.009865 |   |
| cht_Phasecode_0.70_0.50.tif | 803263 | 119676 | 100   | 482   | 0.828179 | 0.004011 | 0.007984 | 0.004008 |   |
| cht_Phasecode_0.70_0.55.tif | 803331 | 120002 | 32    | 156   | 0.829787 | 0.001298 | 0.002593 | 0.001298 |   |
| cht_Phasecode_0.70_0.60.tif | 803363 | 120158 | 0     | 0     | 0        | 0        | 0        | 0        | 0 |
| cht_Phasecode_0.70_0.65.tif | 803363 | 120158 | 0     | 0     | 0        | 0        | 0        | 0        | 0 |
| cht_Phasecode_0.70_0.70.tif | 803363 | 120158 | 0     | 0     | 0        | 0        | 0        | 0        | 0 |
| cht_Phasecode_0.70_0.75.tif | 803363 | 120158 | 0     | 0     | 0        | 0        | 0        | 0        | 0 |
| cht_Phasecode_0.70_0.80.tif | 803363 | 120158 | 0     | 0     | 0        | 0        | 0        | 0        | 0 |
| cht_Phasecode_0.70_0.85.tif | 803363 | 120158 | 0     | 0     | 0        | 0        | 0        | 0        | 0 |
| cht_Phasecode_0.70_0.90.tif | 803363 | 120158 | 0     | 0     | 0        | 0        | 0        | 0        | 0 |
| cht_Phasecode_0.70_0.95.tif | 803363 | 120158 | 0     | 0     | 0        | 0        | 0        | 0        | 0 |
| cht_Phasecode_0.70_1.00.tif | 803363 | 120158 | 0     | 0     | 0        | 0        | 0        | 0        | 0 |
| cht_Phasecode_0.75_0.05.tif | 775345 | 61993  | 28018 | 58165 | 0.674901 | 0.484071 | 0.563775 | 0.39254  |   |
| cht_Phasecode_0.75_0.10.tif | 785699 | 69306  | 17664 | 50852 | 0.742192 | 0.423209 | 0.539046 | 0.368969 |   |
| cht_Phasecode_0.75_0.15.tif | 793337 | 80741  | 10026 | 39417 | 0.797221 | 0.328043 | 0.46482  | 0.302779 |   |
| cht_Phasecode_0.75_0.20.tif | 797125 | 89764  | 6238  | 30394 | 0.829712 | 0.25295  | 0.387703 | 0.240466 |   |
| cht_Phasecode_0.75_0.25.tif | 799977 | 98932  | 3386  | 21226 | 0.862425 | 0.176651 | 0.293238 | 0.171809 |   |
| cht_Phasecode_0.75_0.30.tif | 801307 | 106182 | 2056  | 13976 | 0.871756 | 0.116314 | 0.205243 | 0.114357 |   |
| cht_Phasecode_0.75_0.35.tif | 802457 | 112767 | 906   | 7391  | 0.890804 | 0.061511 | 0.115075 | 0.06105  |   |
| cht_Phasecode_0.75_0.40.tif | 802901 | 116038 | 462   | 4120  | 0.899171 | 0.034288 | 0.066057 | 0.034157 |   |
| cht_Phasecode_0.75_0.45.tif | 803101 | 117817 | 262   | 2341  | 0.899347 | 0.019483 | 0.038139 | 0.01944  |   |
| cht_Phasecode_0.75_0.50.tif | 803238 | 119187 | 125   | 971   | 0.885949 | 0.008081 | 0.016016 | 0.008073 |   |
| cht_Phasecode_0.75_0.55.tif | 803285 | 119674 | 78    | 484   | 0.86121  | 0.004028 | 0.008019 | 0.004025 |   |
| cht_Phasecode_0.75_0.60.tif | 803363 | 120158 | 0     | 0     | 0        | 0        | 0        | 0        | 0 |
| cht_Phasecode_0.75_0.65.tif | 803363 | 120158 | 0     | 0     | 0        | 0        | 0        | 0        | 0 |
| cht_Phasecode_0.75_0.70.tif | 803363 | 120158 | 0     | 0     | 0        | 0        | 0        | 0        | 0 |
| cht_Phasecode_0.75_0.75.tif | 803363 | 120158 | 0     | 0     | 0        | 0        | 0        | 0        | 0 |
| cht_Phasecode_0.75_0.80.tif | 803363 | 120158 | 0     | 0     | 0        | 0        | 0        | 0        | 0 |
| cht_Phasecode_0.75_0.85.tif | 803363 | 120158 | 0     | 0     | 0        | 0        | 0        | 0        | 0 |
| cht_Phasecode_0.75_0.90.tif | 803363 | 120158 | 0     | 0     | 0        | 0        | 0        | 0        | 0 |
| cht_Phasecode_0.75_0.95.tif | 803363 | 120158 | 0     | 0     | 0        | 0        | 0        | 0        | 0 |
| cht_Phasecode_0.75_1.00.tif | 803363 | 120158 | 0     | 0     | 0        | 0        | 0        | 0        | 0 |
| cht_Phasecode_0.80_0.05.tif | 744599 | 29861  | 58764 | 90297 | 0.605772 | 0.751486 | 0.670807 | 0.504672 |   |
| cht_Phasecode_0.80_0.10.tif | 767872 | 40774  | 35491 | 79384 | 0.691047 | 0.660663 | 0.675514 | 0.510019 |   |
| cht_Phasecode_0.80_0.15.tif | 783361 | 61351  | 20002 | 58807 | 0.746197 | 0.489414 | 0.591123 | 0.41957  |   |
| cht_Phasecode_0.80_0.20.tif | 791801 | 77973  | 11562 | 42185 | 0.784881 | 0.351079 | 0.48515  | 0.320263 |   |
| cht_Phasecode_0.80_0.25.tif | 796623 | 88394  | 6740  | 31764 | 0.824953 | 0.264352 | 0.400398 | 0.250311 |   |
| cht_Phasecode_0.80_0.30.tif | 798734 | 98950  | 4629  | 21208 | 0.820838 | 0.176501 | 0.29053  | 0.169954 |   |
| cht_Phasecode_0.80_0.35.tif | 801283 | 106356 | 2080  | 13802 | 0.869034 | 0.114865 | 0.202911 | 0.112911 |   |
| cht_Phasecode_0.80_0.40.tif | 802273 | 111657 | 1090  | 8501  | 0.886352 | 0.070749 | 0.131038 | 0.070112 |   |
| cht_Phasecode_0.80_0.45.tif | 802724 | 115114 | 639   | 5044  | 0.887559 | 0.041978 | 0.080165 | 0.041756 |   |
| cht_Phasecode_0.80_0.50.tif | 803010 | 117075 | 353   | 3083  | 0.897264 | 0.025658 | 0.049889 | 0.025583 |   |

|                             |        |        |        |        |          |          |          |          |
|-----------------------------|--------|--------|--------|--------|----------|----------|----------|----------|
| cht_Phasecode_0.80_0.55.tif | 803229 | 119091 | 134    | 1067   | 0.888426 | 0.00888  | 0.017584 | 0.00887  |
| cht_Phasecode_0.80_0.60.tif | 803301 | 119853 | 62     | 305    | 0.831063 | 0.002538 | 0.005061 | 0.002537 |
| cht_Phasecode_0.80_0.65.tif | 803363 | 120158 | 0      | 0      | 0        | 0        | 0        | 0        |
| cht_Phasecode_0.80_0.70.tif | 803363 | 120158 | 0      | 0      | 0        | 0        | 0        | 0        |
| cht_Phasecode_0.80_0.75.tif | 803363 | 120158 | 0      | 0      | 0        | 0        | 0        | 0        |
| cht_Phasecode_0.80_0.80.tif | 803363 | 120158 | 0      | 0      | 0        | 0        | 0        | 0        |
| cht_Phasecode_0.80_0.85.tif | 803363 | 120158 | 0      | 0      | 0        | 0        | 0        | 0        |
| cht_Phasecode_0.80_0.90.tif | 803363 | 120158 | 0      | 0      | 0        | 0        | 0        | 0        |
| cht_Phasecode_0.80_0.95.tif | 803363 | 120158 | 0      | 0      | 0        | 0        | 0        | 0        |
| cht_Phasecode_0.80_1.00.tif | 803363 | 120158 | 0      | 0      | 0        | 0        | 0        | 0        |
| cht_Phasecode_0.85_0.05.tif | 690529 | 8923   | 112834 | 111235 | 0.496432 | 0.925739 | 0.646289 | 0.47742  |
| cht_Phasecode_0.85_0.10.tif | 743224 | 21329  | 60139  | 98829  | 0.621691 | 0.822492 | 0.708132 | 0.548146 |
| cht_Phasecode_0.85_0.15.tif | 767918 | 41635  | 35445  | 78523  | 0.688992 | 0.653498 | 0.670776 | 0.504637 |
| cht_Phasecode_0.85_0.20.tif | 781487 | 60989  | 21876  | 59169  | 0.730076 | 0.492427 | 0.588152 | 0.416583 |
| cht_Phasecode_0.85_0.25.tif | 789704 | 75542  | 13659  | 44616  | 0.765611 | 0.371311 | 0.500087 | 0.333411 |
| cht_Phasecode_0.85_0.30.tif | 794493 | 87920  | 8870   | 32238  | 0.784227 | 0.268297 | 0.399811 | 0.249853 |
| cht_Phasecode_0.85_0.35.tif | 798197 | 96588  | 5166   | 23570  | 0.820226 | 0.196158 | 0.316601 | 0.188073 |
| cht_Phasecode_0.85_0.40.tif | 800431 | 105134 | 2932   | 15024  | 0.836712 | 0.125035 | 0.217559 | 0.122057 |
| cht_Phasecode_0.85_0.45.tif | 801895 | 111013 | 1468   | 9145   | 0.861679 | 0.076108 | 0.139863 | 0.07519  |
| cht_Phasecode_0.85_0.50.tif | 802321 | 113475 | 1042   | 6683   | 0.865113 | 0.055618 | 0.104517 | 0.05514  |
| cht_Phasecode_0.85_0.55.tif | 802913 | 115951 | 450    | 4207   | 0.903371 | 0.035012 | 0.067412 | 0.034882 |
| cht_Phasecode_0.85_0.60.tif | 803220 | 118350 | 143    | 1808   | 0.926704 | 0.015047 | 0.029613 | 0.015029 |
| cht_Phasecode_0.85_0.65.tif | 803288 | 119482 | 75     | 676    | 0.900133 | 0.005626 | 0.011182 | 0.005622 |
| cht_Phasecode_0.85_0.70.tif | 803352 | 120045 | 11     | 113    | 0.91129  | 0.000094 | 0.001879 | 0.00094  |
| cht_Phasecode_0.85_0.75.tif | 803363 | 120158 | 0      | 0      | 0        | 0        | 0        | 0        |
| cht_Phasecode_0.85_0.80.tif | 803363 | 120158 | 0      | 0      | 0        | 0        | 0        | 0        |
| cht_Phasecode_0.85_0.85.tif | 803363 | 120158 | 0      | 0      | 0        | 0        | 0        | 0        |
| cht_Phasecode_0.85_0.90.tif | 803363 | 120158 | 0      | 0      | 0        | 0        | 0        | 0        |
| cht_Phasecode_0.85_0.95.tif | 803363 | 120158 | 0      | 0      | 0        | 0        | 0        | 0        |
| cht_Phasecode_0.85_1.00.tif | 803363 | 120158 | 0      | 0      | 0        | 0        | 0        | 0        |
| cht_Phasecode_0.90_0.05.tif | 632676 | 1148   | 170687 | 119010 | 0.410809 | 0.990446 | 0.580742 | 0.409187 |
| cht_Phasecode_0.90_0.10.tif | 707995 | 8989   | 95368  | 111169 | 0.538252 | 0.92519  | 0.680568 | 0.515803 |
| cht_Phasecode_0.90_0.15.tif | 747181 | 29435  | 56182  | 90723  | 0.617562 | 0.755031 | 0.679413 | 0.514478 |
| cht_Phasecode_0.90_0.20.tif | 766726 | 47688  | 36637  | 72470  | 0.66421  | 0.633123 | 0.632194 | 0.562196 |
| cht_Phasecode_0.90_0.25.tif | 778760 | 63593  | 24603  | 56565  | 0.696888 | 0.470755 | 0.561924 | 0.390748 |
| cht_Phasecode_0.90_0.30.tif | 786796 | 76918  | 16567  | 43240  | 0.722992 | 0.35986  | 0.480538 | 0.316255 |
| cht_Phasecode_0.90_0.35.tif | 792039 | 87610  | 11324  | 32548  | 0.741885 | 0.270877 | 0.396854 | 0.247547 |
| cht_Phasecode_0.90_0.40.tif | 796334 | 97645  | 7029   | 22513  | 0.762068 | 0.187362 | 0.300775 | 0.177007 |
| cht_Phasecode_0.90_0.45.tif | 799349 | 104693 | 4014   | 15465  | 0.793932 | 0.128706 | 0.221503 | 0.124545 |
| cht_Phasecode_0.90_0.50.tif | 800985 | 109794 | 2378   | 10364  | 0.813373 | 0.086253 | 0.155967 | 0.084579 |
| cht_Phasecode_0.90_0.55.tif | 801867 | 113298 | 1496   | 6860   | 0.820967 | 0.057091 | 0.106759 | 0.056389 |
| cht_Phasecode_0.90_0.60.tif | 802753 | 116566 | 610    | 3592   | 0.854831 | 0.029894 | 0.057768 | 0.029743 |
| cht_Phasecode_0.90_0.65.tif | 802878 | 118121 | 485    | 2037   | 0.807692 | 0.016953 | 0.033208 | 0.016885 |
| cht_Phasecode_0.90_0.70.tif | 803282 | 119158 | 81     | 1000   | 0.925069 | 0.008322 | 0.016496 | 0.008317 |
| cht_Phasecode_0.90_0.75.tif | 803289 | 119427 | 74     | 731    | 0.908075 | 0.006084 | 0.012086 | 0.00608  |
| cht_Phasecode_0.90_0.80.tif | 803352 | 120065 | 11     | 93     | 0.894231 | 0.000774 | 0.001547 | 0.000774 |
| cht_Phasecode_0.90_0.85.tif | 803363 | 120158 | 0      | 0      | 0        | 0        | 0        | 0        |
| cht_Phasecode_0.90_0.90.tif | 803363 | 120158 | 0      | 0      | 0        | 0        | 0        | 0        |
| cht_Phasecode_0.90_0.95.tif | 803363 | 120158 | 0      | 0      | 0        | 0        | 0        | 0        |
| cht_Phasecode_0.90_1.00.tif | 803363 | 120158 | 0      | 0      | 0        | 0        | 0        | 0        |
| cht_Phasecode_0.95_0.05.tif | 539586 | 59     | 263777 | 120099 | 0.312859 | 0.999509 | 0.476551 | 0.312811 |
| cht_Phasecode_0.95_0.10.tif | 628370 | 2166   | 174993 | 117992 | 0.402724 | 0.981974 | 0.571192 | 0.399768 |
| cht_Phasecode_0.95_0.15.tif | 686955 | 15384  | 116408 | 104774 | 0.4737   | 0.871969 | 0.613898 | 0.442895 |
| cht_Phasecode_0.95_0.20.tif | 730675 | 34608  | 72688  | 85550  | 0.540641 | 0.711979 | 0.614592 | 0.443618 |
| cht_Phasecode_0.95_0.25.tif | 751469 | 50115  | 51894  | 70043  | 0.57442  | 0.582924 | 0.578641 | 0.407104 |
| cht_Phasecode_0.95_0.30.tif | 769217 | 64261  | 34146  | 55897  | 0.620781 | 0.465196 | 0.531843 | 0.362252 |
| cht_Phasecode_0.95_0.35.tif | 779672 | 77517  | 23691  | 42641  | 0.642842 | 0.354874 | 0.457301 | 0.296429 |
| cht_Phasecode_0.95_0.40.tif | 786305 | 86779  | 17058  | 33379  | 0.661796 | 0.277793 | 0.391324 | 0.243259 |
| cht_Phasecode_0.95_0.45.tif | 790792 | 94169  | 12571  | 25989  | 0.673989 | 0.21629  | 0.327486 | 0.195805 |
| cht_Phasecode_0.95_0.50.tif | 795296 | 102301 | 8067   | 17857  | 0.688821 | 0.148613 | 0.244479 | 0.139263 |
| cht_Phasecode_0.95_0.55.tif | 798752 | 109469 | 4611   | 10689  | 0.698627 | 0.088958 | 0.15782  | 0.08567  |
| cht_Phasecode_0.95_0.60.tif | 800430 | 112490 | 2933   | 7668   | 0.723328 | 0.063816 | 0.117284 | 0.062295 |
| cht_Phasecode_0.95_0.65.tif | 802229 | 115652 | 1134   | 4506   | 0.798936 | 0.037501 | 0.071639 | 0.03715  |
| cht_Phasecode_0.95_0.70.tif | 802396 | 117624 | 967    | 2534   | 0.723793 | 0.021089 | 0.040984 | 0.020921 |
| cht_Phasecode_0.95_0.75.tif | 803002 | 118864 | 361    | 1294   | 0.781873 | 0.010769 | 0.021246 | 0.010737 |
| cht_Phasecode_0.95_0.80.tif | 803300 | 119413 | 63     | 745    | 0.922203 | 0.0062   | 0.012318 | 0.006197 |
| cht_Phasecode_0.95_0.85.tif | 803363 | 120158 | 0      | 0      | 0        | 0        | 0        | 0        |
| cht_Phasecode_0.95_0.90.tif | 803363 | 120158 | 0      | 0      | 0        | 0        | 0        | 0        |
| cht_Phasecode_0.95_0.95.tif | 803363 | 120158 | 0      | 0      | 0        | 0        | 0        | 0        |
| cht_Phasecode_0.95_1.00.tif | 803363 | 120158 | 0      | 0      | 0        | 0        | 0        | 0        |
| cht_Phasecode_1.00_0.05.tif | 155312 | 0      | 648051 | 120158 | 0.156413 | 1        | 0.270514 | 0.156413 |
| cht_Phasecode_1.00_0.10.tif | 235932 | 5      | 567431 | 120153 | 0.174747 | 0.999958 | 0.297503 | 0.174745 |
| cht_Phasecode_1.00_0.15.tif | 372779 | 2229   | 430584 | 117929 | 0.214998 | 0.981449 | 0.352727 | 0.214127 |
| cht_Phasecode_1.00_0.20.tif | 529244 | 13015  | 274119 | 107143 | 0.281022 | 0.891684 | 0.427358 | 0.271745 |
| cht_Phasecode_1.00_0.25.tif | 598725 | 27220  | 204638 | 92938  | 0.312317 | 0.773465 | 0.444963 | 0.286143 |
| cht_Phasecode_1.00_0.30.tif | 647532 | 37384  | 155831 | 82774  | 0.346908 | 0.688876 | 0.461441 | 0.299918 |
| cht_Phasecode_1.00_0.35.tif | 689170 | 49736  | 114193 | 70422  | 0.381453 | 0.586078 | 0.462128 | 0.300498 |
| cht_Phasecode_1.00_0.40.tif | 724982 | 63732  | 78381  | 56426  | 0.418569 | 0.469598 | 0.442618 | 0.284206 |
| cht_Phasecode_1.00_0.45.tif | 744746 | 74840  | 58617  | 45318  | 0.436023 | 0.377153 | 0.404457 | 0.253492 |
| cht_Phasecode_1.00_0.50.tif | 760956 | 85410  | 42407  | 34748  | 0.450366 | 0.289186 | 0.352212 | 0.213748 |

|                             |        |        |       |       |          |          |          |          |
|-----------------------------|--------|--------|-------|-------|----------|----------|----------|----------|
| cht_Phasecode_1.00_0.55.tif | 778088 | 94981  | 25275 | 25177 | 0.499029 | 0.209532 | 0.295141 | 0.173118 |
| cht_Phasecode_1.00_0.60.tif | 781960 | 102416 | 21403 | 17742 | 0.453238 | 0.147656 | 0.222745 | 0.125331 |
| cht_Phasecode_1.00_0.65.tif | 788489 | 108512 | 14874 | 11646 | 0.43914  | 0.096922 | 0.158797 | 0.086246 |
| cht_Phasecode_1.00_0.70.tif | 793121 | 111753 | 10242 | 8405  | 0.450743 | 0.06995  | 0.121105 | 0.064456 |
| cht_Phasecode_1.00_0.75.tif | 796517 | 113974 | 6846  | 6184  | 0.474597 | 0.051466 | 0.092861 | 0.048691 |
| cht_Phasecode_1.00_0.80.tif | 800890 | 117080 | 2473  | 3078  | 0.554495 | 0.025616 | 0.04897  | 0.0251   |
| cht_Phasecode_1.00_0.85.tif | 801561 | 117826 | 1802  | 2332  | 0.564103 | 0.019408 | 0.037525 | 0.019121 |
| cht_Phasecode_1.00_0.90.tif | 802980 | 119635 | 383   | 523   | 0.577263 | 0.004353 | 0.00864  | 0.004339 |
| cht_Phasecode_1.00_0.95.tif | 802955 | 119754 | 408   | 404   | 0.497537 | 0.003362 | 0.006679 | 0.003351 |
| cht_Phasecode_1.00_1.00.tif | 803363 | 120158 | 0     | 0     | 0        | 0        | 0        | 0        |
| cht_TwoStage_0.05_0.05.tif  | 797794 | 100353 | 5569  | 19805 | 0.780523 | 0.164825 | 0.272174 | 0.157524 |
| cht_TwoStage_0.05_0.10.tif  | 801117 | 108013 | 2246  | 12145 | 0.84393  | 0.101075 | 0.180529 | 0.099221 |
| cht_TwoStage_0.05_0.15.tif  | 802408 | 113870 | 955   | 6288  | 0.868149 | 0.052331 | 0.098712 | 0.051918 |
| cht_TwoStage_0.05_0.20.tif  | 802972 | 117069 | 391   | 3089  | 0.887644 | 0.025708 | 0.049968 | 0.025624 |
| cht_TwoStage_0.05_0.25.tif  | 803248 | 118990 | 115   | 1168  | 0.910366 | 0.009721 | 0.019236 | 0.009711 |
| cht_TwoStage_0.05_0.30.tif  | 803337 | 119672 | 26    | 486   | 0.949219 | 0.004045 | 0.008055 | 0.004044 |
| cht_TwoStage_0.05_0.35.tif  | 803363 | 120158 | 0     | 0     | 0        | 0        | 0        | 0        |
| cht_TwoStage_0.05_0.40.tif  | 803363 | 120158 | 0     | 0     | 0        | 0        | 0        | 0        |
| cht_TwoStage_0.05_0.45.tif  | 803363 | 120158 | 0     | 0     | 0        | 0        | 0        | 0        |
| cht_TwoStage_0.05_0.50.tif  | 803363 | 120158 | 0     | 0     | 0        | 0        | 0        | 0        |
| cht_TwoStage_0.05_0.55.tif  | 803363 | 120158 | 0     | 0     | 0        | 0        | 0        | 0        |
| cht_TwoStage_0.05_0.60.tif  | 803363 | 120158 | 0     | 0     | 0        | 0        | 0        | 0        |
| cht_TwoStage_0.05_0.65.tif  | 803363 | 120158 | 0     | 0     | 0        | 0        | 0        | 0        |
| cht_TwoStage_0.05_0.70.tif  | 803363 | 120158 | 0     | 0     | 0        | 0        | 0        | 0        |
| cht_TwoStage_0.05_0.75.tif  | 803363 | 120158 | 0     | 0     | 0        | 0        | 0        | 0        |
| cht_TwoStage_0.05_0.80.tif  | 803363 | 120158 | 0     | 0     | 0        | 0        | 0        | 0        |
| cht_TwoStage_0.05_0.85.tif  | 803363 | 120158 | 0     | 0     | 0        | 0        | 0        | 0        |
| cht_TwoStage_0.05_0.90.tif  | 803363 | 120158 | 0     | 0     | 0        | 0        | 0        | 0        |
| cht_TwoStage_0.05_0.95.tif  | 803363 | 120158 | 0     | 0     | 0        | 0        | 0        | 0        |
| cht_TwoStage_0.05_1.00.tif  | 803363 | 120158 | 0     | 0     | 0        | 0        | 0        | 0        |
| cht_TwoStage_0.10_0.05.tif  | 796861 | 96510  | 6502  | 23648 | 0.784345 | 0.196808 | 0.314661 | 0.186705 |
| cht_TwoStage_0.10_0.10.tif  | 800339 | 104478 | 3024  | 15680 | 0.838323 | 0.130495 | 0.225836 | 0.127291 |
| cht_TwoStage_0.10_0.15.tif  | 802229 | 112559 | 1134  | 7599  | 0.870148 | 0.063242 | 0.117914 | 0.06265  |
| cht_TwoStage_0.10_0.20.tif  | 802928 | 116344 | 435   | 3814  | 0.897623 | 0.031742 | 0.061315 | 0.031627 |
| cht_TwoStage_0.10_0.25.tif  | 803136 | 118375 | 227   | 1783  | 0.887065 | 0.014839 | 0.029189 | 0.014811 |
| cht_TwoStage_0.10_0.30.tif  | 803333 | 119539 | 30    | 619   | 0.953775 | 0.005152 | 0.010248 | 0.00515  |
| cht_TwoStage_0.10_0.35.tif  | 803363 | 120158 | 0     | 0     | 0        | 0        | 0        | 0        |
| cht_TwoStage_0.10_0.40.tif  | 803363 | 120158 | 0     | 0     | 0        | 0        | 0        | 0        |
| cht_TwoStage_0.10_0.45.tif  | 803363 | 120158 | 0     | 0     | 0        | 0        | 0        | 0        |
| cht_TwoStage_0.10_0.50.tif  | 803363 | 120158 | 0     | 0     | 0        | 0        | 0        | 0        |
| cht_TwoStage_0.10_0.55.tif  | 803363 | 120158 | 0     | 0     | 0        | 0        | 0        | 0        |
| cht_TwoStage_0.10_0.60.tif  | 803363 | 120158 | 0     | 0     | 0        | 0        | 0        | 0        |
| cht_TwoStage_0.10_0.65.tif  | 803363 | 120158 | 0     | 0     | 0        | 0        | 0        | 0        |
| cht_TwoStage_0.10_0.70.tif  | 803363 | 120158 | 0     | 0     | 0        | 0        | 0        | 0        |
| cht_TwoStage_0.10_0.75.tif  | 803363 | 120158 | 0     | 0     | 0        | 0        | 0        | 0        |
| cht_TwoStage_0.10_0.80.tif  | 803363 | 120158 | 0     | 0     | 0        | 0        | 0        | 0        |
| cht_TwoStage_0.10_0.85.tif  | 803363 | 120158 | 0     | 0     | 0        | 0        | 0        | 0        |
| cht_TwoStage_0.10_0.90.tif  | 803363 | 120158 | 0     | 0     | 0        | 0        | 0        | 0        |
| cht_TwoStage_0.10_0.95.tif  | 803363 | 120158 | 0     | 0     | 0        | 0        | 0        | 0        |
| cht_TwoStage_0.10_1.00.tif  | 803363 | 120158 | 0     | 0     | 0        | 0        | 0        | 0        |
| cht_TwoStage_0.15_0.05.tif  | 794814 | 90788  | 8549  | 29370 | 0.774546 | 0.244428 | 0.371591 | 0.228193 |
| cht_TwoStage_0.15_0.10.tif  | 799685 | 101698 | 3678  | 18460 | 0.83386  | 0.153631 | 0.259459 | 0.149068 |
| cht_TwoStage_0.15_0.15.tif  | 801738 | 110465 | 1625  | 9693  | 0.856423 | 0.080669 | 0.147449 | 0.079592 |
| cht_TwoStage_0.15_0.20.tif  | 802809 | 115095 | 554   | 5063  | 0.901371 | 0.042136 | 0.080509 | 0.041943 |
| cht_TwoStage_0.15_0.25.tif  | 803085 | 117980 | 278   | 2178  | 0.886808 | 0.018126 | 0.035526 | 0.018084 |
| cht_TwoStage_0.15_0.30.tif  | 803250 | 118772 | 113   | 1386  | 0.924616 | 0.011535 | 0.022785 | 0.011524 |
| cht_TwoStage_0.15_0.35.tif  | 803363 | 120158 | 0     | 0     | 0        | 0        | 0        | 0        |
| cht_TwoStage_0.15_0.40.tif  | 803363 | 120158 | 0     | 0     | 0        | 0        | 0        | 0        |
| cht_TwoStage_0.15_0.45.tif  | 803363 | 120158 | 0     | 0     | 0        | 0        | 0        | 0        |
| cht_TwoStage_0.15_0.50.tif  | 803363 | 120158 | 0     | 0     | 0        | 0        | 0        | 0        |
| cht_TwoStage_0.15_0.55.tif  | 803363 | 120158 | 0     | 0     | 0        | 0        | 0        | 0        |
| cht_TwoStage_0.15_0.60.tif  | 803363 | 120158 | 0     | 0     | 0        | 0        | 0        | 0        |
| cht_TwoStage_0.15_0.65.tif  | 803363 | 120158 | 0     | 0     | 0        | 0        | 0        | 0        |
| cht_TwoStage_0.15_0.70.tif  | 803363 | 120158 | 0     | 0     | 0        | 0        | 0        | 0        |
| cht_TwoStage_0.15_0.75.tif  | 803363 | 120158 | 0     | 0     | 0        | 0        | 0        | 0        |
| cht_TwoStage_0.15_0.80.tif  | 803363 | 120158 | 0     | 0     | 0        | 0        | 0        | 0        |
| cht_TwoStage_0.15_0.85.tif  | 803363 | 120158 | 0     | 0     | 0        | 0        | 0        | 0        |
| cht_TwoStage_0.15_0.90.tif  | 803363 | 120158 | 0     | 0     | 0        | 0        | 0        | 0        |
| cht_TwoStage_0.15_0.95.tif  | 803363 | 120158 | 0     | 0     | 0        | 0        | 0        | 0        |
| cht_TwoStage_0.15_1.00.tif  | 803363 | 120158 | 0     | 0     | 0        | 0        | 0        | 0        |
| cht_TwoStage_0.20_0.05.tif  | 792146 | 83373  | 11217 | 36785 | 0.766322 | 0.306139 | 0.4375   | 0.28     |
| cht_TwoStage_0.20_0.10.tif  | 798945 | 98365  | 4418  | 21793 | 0.831445 | 0.18137  | 0.297782 | 0.174937 |
| cht_TwoStage_0.20_0.15.tif  | 801093 | 107235 | 2270  | 12923 | 0.850589 | 0.10755  | 0.190955 | 0.105556 |
| cht_TwoStage_0.20_0.20.tif  | 802339 | 113345 | 1024  | 6813  | 0.869338 | 0.0567   | 0.106457 | 0.056221 |
| cht_TwoStage_0.20_0.25.tif  | 803074 | 117429 | 289   | 2729  | 0.904241 | 0.022712 | 0.044311 | 0.022657 |
| cht_TwoStage_0.20_0.30.tif  | 803258 | 118650 | 105   | 1508  | 0.934904 | 0.01255  | 0.024768 | 0.012539 |
| cht_TwoStage_0.20_0.35.tif  | 803340 | 119773 | 23    | 385   | 0.943627 | 0.003204 | 0.006387 | 0.003204 |
| cht_TwoStage_0.20_0.40.tif  | 803363 | 120158 | 0     | 0     | 0        | 0        | 0        | 0        |
| cht_TwoStage_0.20_0.45.tif  | 803363 | 120158 | 0     | 0     | 0        | 0        | 0        | 0        |
| cht_TwoStage_0.20_0.50.tif  | 803363 | 120158 | 0     | 0     | 0        | 0        | 0        | 0        |

|                            |        |        |       |       |          |          |          |          |   |
|----------------------------|--------|--------|-------|-------|----------|----------|----------|----------|---|
| cht_TwoStage_0.20_0.55.tif | 803363 | 120158 | 0     | 0     | 0        | 0        | 0        | 0        | 0 |
| cht_TwoStage_0.20_0.60.tif | 803363 | 120158 | 0     | 0     | 0        | 0        | 0        | 0        | 0 |
| cht_TwoStage_0.20_0.65.tif | 803363 | 120158 | 0     | 0     | 0        | 0        | 0        | 0        | 0 |
| cht_TwoStage_0.20_0.70.tif | 803363 | 120158 | 0     | 0     | 0        | 0        | 0        | 0        | 0 |
| cht_TwoStage_0.20_0.75.tif | 803363 | 120158 | 0     | 0     | 0        | 0        | 0        | 0        | 0 |
| cht_TwoStage_0.20_0.80.tif | 803363 | 120158 | 0     | 0     | 0        | 0        | 0        | 0        | 0 |
| cht_TwoStage_0.20_0.85.tif | 803363 | 120158 | 0     | 0     | 0        | 0        | 0        | 0        | 0 |
| cht_TwoStage_0.20_0.90.tif | 803363 | 120158 | 0     | 0     | 0        | 0        | 0        | 0        | 0 |
| cht_TwoStage_0.20_0.95.tif | 803363 | 120158 | 0     | 0     | 0        | 0        | 0        | 0        | 0 |
| cht_TwoStage_0.20_1.00.tif | 803363 | 120158 | 0     | 0     | 0        | 0        | 0        | 0        | 0 |
| cht_TwoStage_0.25_0.05.tif | 789914 | 76278  | 13449 | 43880 | 0.765407 | 0.365186 | 0.494459 | 0.328426 |   |
| cht_TwoStage_0.25_0.10.tif | 797647 | 92596  | 5716  | 27562 | 0.828235 | 0.229381 | 0.359264 | 0.218965 |   |
| cht_TwoStage_0.25_0.15.tif | 800584 | 104271 | 2779  | 15887 | 0.85112  | 0.132218 | 0.22888  | 0.129229 |   |
| cht_TwoStage_0.25_0.20.tif | 801859 | 110987 | 1504  | 9171  | 0.85911  | 0.076325 | 0.140194 | 0.075381 |   |
| cht_TwoStage_0.25_0.25.tif | 802818 | 116530 | 545   | 3628  | 0.869399 | 0.030194 | 0.05836  | 0.030057 |   |
| cht_TwoStage_0.25_0.30.tif | 803219 | 118590 | 144   | 1568  | 0.915888 | 0.013049 | 0.025732 | 0.013034 |   |
| cht_TwoStage_0.25_0.35.tif | 803301 | 119305 | 62    | 853   | 0.93224  | 0.007099 | 0.014091 | 0.007095 |   |
| cht_TwoStage_0.25_0.40.tif | 803363 | 120158 | 0     | 0     | 0        | 0        | 0        | 0        | 0 |
| cht_TwoStage_0.25_0.45.tif | 803363 | 120158 | 0     | 0     | 0        | 0        | 0        | 0        | 0 |
| cht_TwoStage_0.25_0.50.tif | 803363 | 120158 | 0     | 0     | 0        | 0        | 0        | 0        | 0 |
| cht_TwoStage_0.25_0.55.tif | 803363 | 120158 | 0     | 0     | 0        | 0        | 0        | 0        | 0 |
| cht_TwoStage_0.25_0.60.tif | 803363 | 120158 | 0     | 0     | 0        | 0        | 0        | 0        | 0 |
| cht_TwoStage_0.25_0.65.tif | 803363 | 120158 | 0     | 0     | 0        | 0        | 0        | 0        | 0 |
| cht_TwoStage_0.25_0.70.tif | 803363 | 120158 | 0     | 0     | 0        | 0        | 0        | 0        | 0 |
| cht_TwoStage_0.25_0.75.tif | 803363 | 120158 | 0     | 0     | 0        | 0        | 0        | 0        | 0 |
| cht_TwoStage_0.25_0.80.tif | 803363 | 120158 | 0     | 0     | 0        | 0        | 0        | 0        | 0 |
| cht_TwoStage_0.25_0.85.tif | 803363 | 120158 | 0     | 0     | 0        | 0        | 0        | 0        | 0 |
| cht_TwoStage_0.25_0.90.tif | 803363 | 120158 | 0     | 0     | 0        | 0        | 0        | 0        | 0 |
| cht_TwoStage_0.25_0.95.tif | 803363 | 120158 | 0     | 0     | 0        | 0        | 0        | 0        | 0 |
| cht_TwoStage_0.25_1.00.tif | 803363 | 120158 | 0     | 0     | 0        | 0        | 0        | 0        | 0 |
| cht_TwoStage_0.30_0.05.tif | 786349 | 66689  | 17014 | 53469 | 0.758608 | 0.444989 | 0.560939 | 0.389795 |   |
| cht_TwoStage_0.30_0.10.tif | 796270 | 86409  | 7093  | 33749 | 0.826331 | 0.280872 | 0.419242 | 0.265216 |   |
| cht_TwoStage_0.30_0.15.tif | 799859 | 100913 | 3504  | 19245 | 0.845971 | 0.160164 | 0.269336 | 0.155626 |   |
| cht_TwoStage_0.30_0.20.tif | 801431 | 108021 | 1932  | 12137 | 0.862677 | 0.101009 | 0.180843 | 0.09941  |   |
| cht_TwoStage_0.30_0.25.tif | 802606 | 115084 | 757   | 5074  | 0.870177 | 0.042228 | 0.080547 | 0.041963 |   |
| cht_TwoStage_0.30_0.30.tif | 803207 | 118343 | 156   | 1815  | 0.920852 | 0.015105 | 0.029723 | 0.015086 |   |
| cht_TwoStage_0.30_0.35.tif | 803237 | 119100 | 126   | 1058  | 0.893581 | 0.008805 | 0.017438 | 0.008796 |   |
| cht_TwoStage_0.30_0.40.tif | 803363 | 120100 | 0     | 58    | 1        | 0.000483 | 0.000965 | 0.000483 |   |
| cht_TwoStage_0.30_0.45.tif | 803363 | 120158 | 0     | 0     | 0        | 0        | 0        | 0        | 0 |
| cht_TwoStage_0.30_0.50.tif | 803363 | 120158 | 0     | 0     | 0        | 0        | 0        | 0        | 0 |
| cht_TwoStage_0.30_0.55.tif | 803363 | 120158 | 0     | 0     | 0        | 0        | 0        | 0        | 0 |
| cht_TwoStage_0.30_0.60.tif | 803363 | 120158 | 0     | 0     | 0        | 0        | 0        | 0        | 0 |
| cht_TwoStage_0.30_0.65.tif | 803363 | 120158 | 0     | 0     | 0        | 0        | 0        | 0        | 0 |
| cht_TwoStage_0.30_0.70.tif | 803363 | 120158 | 0     | 0     | 0        | 0        | 0        | 0        | 0 |
| cht_TwoStage_0.30_0.75.tif | 803363 | 120158 | 0     | 0     | 0        | 0        | 0        | 0        | 0 |
| cht_TwoStage_0.30_0.80.tif | 803363 | 120158 | 0     | 0     | 0        | 0        | 0        | 0        | 0 |
| cht_TwoStage_0.30_0.85.tif | 803363 | 120158 | 0     | 0     | 0        | 0        | 0        | 0        | 0 |
| cht_TwoStage_0.30_0.90.tif | 803363 | 120158 | 0     | 0     | 0        | 0        | 0        | 0        | 0 |
| cht_TwoStage_0.30_0.95.tif | 803363 | 120158 | 0     | 0     | 0        | 0        | 0        | 0        | 0 |
| cht_TwoStage_0.30_1.00.tif | 803363 | 120158 | 0     | 0     | 0        | 0        | 0        | 0        | 0 |
| cht_TwoStage_0.35_0.05.tif | 780278 | 56957  | 23085 | 63201 | 0.732459 | 0.525982 | 0.612282 | 0.441215 |   |
| cht_TwoStage_0.35_0.10.tif | 794407 | 78743  | 8956  | 41415 | 0.822199 | 0.344671 | 0.485724 | 0.320763 |   |
| cht_TwoStage_0.35_0.15.tif | 799023 | 96002  | 4340  | 24156 | 0.847698 | 0.201035 | 0.324996 | 0.194027 |   |
| cht_TwoStage_0.35_0.20.tif | 800695 | 105102 | 2668  | 15056 | 0.84947  | 0.125302 | 0.21839  | 0.12258  |   |
| cht_TwoStage_0.35_0.25.tif | 802422 | 113711 | 941   | 6447  | 0.872631 | 0.053654 | 0.101093 | 0.053237 |   |
| cht_TwoStage_0.35_0.30.tif | 803080 | 117383 | 283   | 2775  | 0.907456 | 0.023095 | 0.045043 | 0.02304  |   |
| cht_TwoStage_0.35_0.35.tif | 803217 | 118751 | 146   | 1407  | 0.905988 | 0.011171 | 0.02312  | 0.011695 |   |
| cht_TwoStage_0.35_0.40.tif | 803327 | 119734 | 36    | 424   | 0.921739 | 0.003529 | 0.00703  | 0.003528 |   |
| cht_TwoStage_0.35_0.45.tif | 803363 | 120158 | 0     | 0     | 0        | 0        | 0        | 0        | 0 |
| cht_TwoStage_0.35_0.50.tif | 803363 | 120158 | 0     | 0     | 0        | 0        | 0        | 0        | 0 |
| cht_TwoStage_0.35_0.55.tif | 803363 | 120158 | 0     | 0     | 0        | 0        | 0        | 0        | 0 |
| cht_TwoStage_0.35_0.60.tif | 803363 | 120158 | 0     | 0     | 0        | 0        | 0        | 0        | 0 |
| cht_TwoStage_0.35_0.65.tif | 803363 | 120158 | 0     | 0     | 0        | 0        | 0        | 0        | 0 |
| cht_TwoStage_0.35_0.70.tif | 803363 | 120158 | 0     | 0     | 0        | 0        | 0        | 0        | 0 |
| cht_TwoStage_0.35_0.75.tif | 803363 | 120158 | 0     | 0     | 0        | 0        | 0        | 0        | 0 |
| cht_TwoStage_0.35_0.80.tif | 803363 | 120158 | 0     | 0     | 0        | 0        | 0        | 0        | 0 |
| cht_TwoStage_0.35_0.85.tif | 803363 | 120158 | 0     | 0     | 0        | 0        | 0        | 0        | 0 |
| cht_TwoStage_0.35_0.90.tif | 803363 | 120158 | 0     | 0     | 0        | 0        | 0        | 0        | 0 |
| cht_TwoStage_0.35_0.95.tif | 803363 | 120158 | 0     | 0     | 0        | 0        | 0        | 0        | 0 |
| cht_TwoStage_0.35_1.00.tif | 803363 | 120158 | 0     | 0     | 0        | 0        | 0        | 0        | 0 |
| cht_TwoStage_0.40_0.05.tif | 775463 | 48297  | 27900 | 71861 | 0.720332 | 0.598054 | 0.653522 | 0.485357 |   |
| cht_TwoStage_0.40_0.10.tif | 791324 | 71369  | 12039 | 48789 | 0.802081 | 0.40604  | 0.539147 | 0.369063 |   |
| cht_TwoStage_0.40_0.15.tif | 797287 | 90452  | 6076  | 29706 | 0.830194 | 0.247224 | 0.380993 | 0.235325 |   |
| cht_TwoStage_0.40_0.20.tif | 800426 | 102772 | 2937  | 17386 | 0.855484 | 0.144693 | 0.247521 | 0.141241 |   |
| cht_TwoStage_0.40_0.25.tif | 801889 | 110845 | 1474  | 9313  | 0.863354 | 0.077506 | 0.142243 | 0.076567 |   |
| cht_TwoStage_0.40_0.30.tif | 803002 | 116717 | 361   | 3441  | 0.90505  | 0.028637 | 0.055518 | 0.028552 |   |
| cht_TwoStage_0.40_0.35.tif | 803191 | 118357 | 172   | 1801  | 0.912823 | 0.014989 | 0.029493 | 0.014967 |   |
| cht_TwoStage_0.40_0.40.tif | 803254 | 119258 | 109   | 900   | 0.891972 | 0.00749  | 0.014856 | 0.007483 |   |
| cht_TwoStage_0.40_0.45.tif | 803345 | 120001 | 18    | 157   | 0.897143 | 0.001307 | 0.002609 | 0.001306 |   |
| cht_TwoStage_0.40_0.50.tif | 803363 | 120158 | 0     | 0     | 0        | 0        | 0        | 0        | 0 |

|                            |        |        |       |       |          |          |          |          |   |
|----------------------------|--------|--------|-------|-------|----------|----------|----------|----------|---|
| cht_TwoStage_0.40_0.55.tif | 803363 | 120158 | 0     | 0     | 0        | 0        | 0        | 0        | 0 |
| cht_TwoStage_0.40_0.60.tif | 803363 | 120158 | 0     | 0     | 0        | 0        | 0        | 0        | 0 |
| cht_TwoStage_0.40_0.65.tif | 803363 | 120158 | 0     | 0     | 0        | 0        | 0        | 0        | 0 |
| cht_TwoStage_0.40_0.70.tif | 803363 | 120158 | 0     | 0     | 0        | 0        | 0        | 0        | 0 |
| cht_TwoStage_0.40_0.75.tif | 803363 | 120158 | 0     | 0     | 0        | 0        | 0        | 0        | 0 |
| cht_TwoStage_0.40_0.80.tif | 803363 | 120158 | 0     | 0     | 0        | 0        | 0        | 0        | 0 |
| cht_TwoStage_0.40_0.85.tif | 803363 | 120158 | 0     | 0     | 0        | 0        | 0        | 0        | 0 |
| cht_TwoStage_0.40_0.90.tif | 803363 | 120158 | 0     | 0     | 0        | 0        | 0        | 0        | 0 |
| cht_TwoStage_0.40_0.95.tif | 803363 | 120158 | 0     | 0     | 0        | 0        | 0        | 0        | 0 |
| cht_TwoStage_0.40_1.00.tif | 803363 | 120158 | 0     | 0     | 0        | 0        | 0        | 0        | 0 |
| cht_TwoStage_0.45_0.05.tif | 769510 | 41233  | 33853 | 78925 | 0.699826 | 0.656843 | 0.677654 | 0.512463 |   |
| cht_TwoStage_0.45_0.10.tif | 786734 | 64016  | 16629 | 56142 | 0.771489 | 0.467235 | 0.581996 | 0.410434 |   |
| cht_TwoStage_0.45_0.15.tif | 795569 | 83808  | 7794  | 36350 | 0.823441 | 0.302518 | 0.442478 | 0.284091 |   |
| cht_TwoStage_0.45_0.20.tif | 799884 | 99418  | 3479  | 20740 | 0.856352 | 0.172606 | 0.287303 | 0.167749 |   |
| cht_TwoStage_0.45_0.25.tif | 801390 | 107828 | 1973  | 12330 | 0.862057 | 0.102615 | 0.183399 | 0.100957 |   |
| cht_TwoStage_0.45_0.30.tif | 802473 | 113658 | 890   | 6500  | 0.879567 | 0.054095 | 0.101922 | 0.053698 |   |
| cht_TwoStage_0.45_0.35.tif | 803136 | 117838 | 227   | 2320  | 0.910876 | 0.019308 | 0.037814 | 0.019272 |   |
| cht_TwoStage_0.45_0.40.tif | 803237 | 119019 | 126   | 1139  | 0.900395 | 0.009479 | 0.018761 | 0.009469 |   |
| cht_TwoStage_0.45_0.45.tif | 803343 | 119826 | 20    | 332   | 0.943182 | 0.002763 | 0.00551  | 0.002763 |   |
| cht_TwoStage_0.45_0.50.tif | 803319 | 119989 | 44    | 169   | 0.793427 | 0.001406 | 0.002808 | 0.001406 |   |
| cht_TwoStage_0.45_0.55.tif | 803363 | 120158 | 0     | 0     | 0        | 0        | 0        | 0        | 0 |
| cht_TwoStage_0.45_0.60.tif | 803363 | 120158 | 0     | 0     | 0        | 0        | 0        | 0        | 0 |
| cht_TwoStage_0.45_0.65.tif | 803363 | 120158 | 0     | 0     | 0        | 0        | 0        | 0        | 0 |
| cht_TwoStage_0.45_0.70.tif | 803363 | 120158 | 0     | 0     | 0        | 0        | 0        | 0        | 0 |
| cht_TwoStage_0.45_0.75.tif | 803363 | 120158 | 0     | 0     | 0        | 0        | 0        | 0        | 0 |
| cht_TwoStage_0.45_0.80.tif | 803363 | 120158 | 0     | 0     | 0        | 0        | 0        | 0        | 0 |
| cht_TwoStage_0.45_0.85.tif | 803363 | 120158 | 0     | 0     | 0        | 0        | 0        | 0        | 0 |
| cht_TwoStage_0.45_0.90.tif | 803363 | 120158 | 0     | 0     | 0        | 0        | 0        | 0        | 0 |
| cht_TwoStage_0.45_0.95.tif | 803363 | 120158 | 0     | 0     | 0        | 0        | 0        | 0        | 0 |
| cht_TwoStage_0.45_1.00.tif | 803363 | 120158 | 0     | 0     | 0        | 0        | 0        | 0        | 0 |
| cht_TwoStage_0.50_0.05.tif | 761595 | 32793  | 41768 | 87365 | 0.676551 | 0.727084 | 0.700908 | 0.539537 |   |
| cht_TwoStage_0.50_0.10.tif | 783318 | 57262  | 20045 | 62896 | 0.758322 | 0.523444 | 0.619363 | 0.448607 |   |
| cht_TwoStage_0.50_0.15.tif | 793519 | 78654  | 9844  | 41504 | 0.808289 | 0.345412 | 0.483995 | 0.319257 |   |
| cht_TwoStage_0.50_0.20.tif | 798236 | 93763  | 5127  | 26395 | 0.837352 | 0.219669 | 0.348035 | 0.21068  |   |
| cht_TwoStage_0.50_0.25.tif | 800502 | 102941 | 2861  | 17217 | 0.857506 | 0.143286 | 0.245543 | 0.139954 |   |
| cht_TwoStage_0.50_0.30.tif | 802218 | 111995 | 1145  | 8163  | 0.876988 | 0.067936 | 0.126103 | 0.067294 |   |
| cht_TwoStage_0.50_0.35.tif | 802992 | 116737 | 371   | 3421  | 0.902162 | 0.028471 | 0.0552   | 0.028383 |   |
| cht_TwoStage_0.50_0.40.tif | 803168 | 118703 | 195   | 1455  | 0.881818 | 0.012109 | 0.02389  | 0.012089 |   |
| cht_TwoStage_0.50_0.45.tif | 803343 | 119741 | 20    | 417   | 0.954233 | 0.00347  | 0.006916 | 0.00347  |   |
| cht_TwoStage_0.50_0.50.tif | 803317 | 119853 | 46    | 305   | 0.868946 | 0.002538 | 0.005062 | 0.002537 |   |
| cht_TwoStage_0.50_0.55.tif | 803363 | 120158 | 0     | 0     | 0        | 0        | 0        | 0        | 0 |
| cht_TwoStage_0.50_0.60.tif | 803363 | 120158 | 0     | 0     | 0        | 0        | 0        | 0        | 0 |
| cht_TwoStage_0.50_0.65.tif | 803363 | 120158 | 0     | 0     | 0        | 0        | 0        | 0        | 0 |
| cht_TwoStage_0.50_0.70.tif | 803363 | 120158 | 0     | 0     | 0        | 0        | 0        | 0        | 0 |
| cht_TwoStage_0.50_0.75.tif | 803363 | 120158 | 0     | 0     | 0        | 0        | 0        | 0        | 0 |
| cht_TwoStage_0.50_0.80.tif | 803363 | 120158 | 0     | 0     | 0        | 0        | 0        | 0        | 0 |
| cht_TwoStage_0.50_0.85.tif | 803363 | 120158 | 0     | 0     | 0        | 0        | 0        | 0        | 0 |
| cht_TwoStage_0.50_0.90.tif | 803363 | 120158 | 0     | 0     | 0        | 0        | 0        | 0        | 0 |
| cht_TwoStage_0.50_0.95.tif | 803363 | 120158 | 0     | 0     | 0        | 0        | 0        | 0        | 0 |
| cht_TwoStage_0.50_1.00.tif | 803363 | 120158 | 0     | 0     | 0        | 0        | 0        | 0        | 0 |
| cht_TwoStage_0.55_0.05.tif | 753929 | 26829  | 49434 | 93329 | 0.653734 | 0.776719 | 0.709939 | 0.550315 |   |
| cht_TwoStage_0.55_0.10.tif | 779721 | 49737  | 23642 | 70421 | 0.748658 | 0.58607  | 0.657461 | 0.489715 |   |
| cht_TwoStage_0.55_0.15.tif | 790924 | 73470  | 12439 | 46688 | 0.789622 | 0.388555 | 0.520824 | 0.352104 |   |
| cht_TwoStage_0.55_0.20.tif | 796402 | 88502  | 6961  | 31656 | 0.819743 | 0.263453 | 0.398753 | 0.249027 |   |
| cht_TwoStage_0.55_0.25.tif | 799740 | 99632  | 3623  | 20526 | 0.849973 | 0.170825 | 0.284477 | 0.165825 |   |
| cht_TwoStage_0.55_0.30.tif | 801537 | 109447 | 1826  | 10711 | 0.854351 | 0.089141 | 0.161438 | 0.087807 |   |
| cht_TwoStage_0.55_0.35.tif | 802792 | 114852 | 571   | 5306  | 0.902842 | 0.044159 | 0.084199 | 0.04395  |   |
| cht_TwoStage_0.55_0.40.tif | 803129 | 118306 | 234   | 1852  | 0.887824 | 0.015413 | 0.0303   | 0.015383 |   |
| cht_TwoStage_0.55_0.45.tif | 803280 | 119284 | 83    | 874   | 0.913271 | 0.007274 | 0.014433 | 0.007269 |   |
| cht_TwoStage_0.55_0.50.tif | 803314 | 119852 | 49    | 306   | 0.861972 | 0.002547 | 0.005078 | 0.002546 |   |
| cht_TwoStage_0.55_0.55.tif | 803363 | 120158 | 0     | 0     | 0        | 0        | 0        | 0        | 0 |
| cht_TwoStage_0.55_0.60.tif | 803363 | 120158 | 0     | 0     | 0        | 0        | 0        | 0        | 0 |
| cht_TwoStage_0.55_0.65.tif | 803363 | 120158 | 0     | 0     | 0        | 0        | 0        | 0        | 0 |
| cht_TwoStage_0.55_0.70.tif | 803363 | 120158 | 0     | 0     | 0        | 0        | 0        | 0        | 0 |
| cht_TwoStage_0.55_0.75.tif | 803363 | 120158 | 0     | 0     | 0        | 0        | 0        | 0        | 0 |
| cht_TwoStage_0.55_0.80.tif | 803363 | 120158 | 0     | 0     | 0        | 0        | 0        | 0        | 0 |
| cht_TwoStage_0.55_0.85.tif | 803363 | 120158 | 0     | 0     | 0        | 0        | 0        | 0        | 0 |
| cht_TwoStage_0.55_0.90.tif | 803363 | 120158 | 0     | 0     | 0        | 0        | 0        | 0        | 0 |
| cht_TwoStage_0.55_0.95.tif | 803363 | 120158 | 0     | 0     | 0        | 0        | 0        | 0        | 0 |
| cht_TwoStage_0.55_1.00.tif | 803363 | 120158 | 0     | 0     | 0        | 0        | 0        | 0        | 0 |
| cht_TwoStage_0.60_0.05.tif | 745391 | 20384  | 57972 | 99774 | 0.632498 | 0.830357 | 0.718047 | 0.560119 |   |
| cht_TwoStage_0.60_0.10.tif | 773985 | 42191  | 29378 | 77967 | 0.726322 | 0.648871 | 0.685415 | 0.521393 |   |
| cht_TwoStage_0.60_0.15.tif | 786899 | 66710  | 16464 | 53448 | 0.764504 | 0.444814 | 0.562403 | 0.391211 |   |
| cht_TwoStage_0.60_0.20.tif | 794368 | 82616  | 8995  | 37542 | 0.806713 | 0.312439 | 0.450427 | 0.290678 |   |
| cht_TwoStage_0.60_0.25.tif | 797965 | 94677  | 5398  | 25481 | 0.825189 | 0.212062 | 0.337414 | 0.202945 |   |
| cht_TwoStage_0.60_0.30.tif | 800322 | 104437 | 3041  | 15721 | 0.837917 | 0.130836 | 0.226332 | 0.127607 |   |
| cht_TwoStage_0.60_0.35.tif | 802400 | 112779 | 963   | 7379  | 0.88456  | 0.061411 | 0.114848 | 0.060923 |   |
| cht_TwoStage_0.60_0.40.tif | 802990 | 116771 | 373   | 3387  | 0.900798 | 0.028188 | 0.054665 | 0.028101 |   |
| cht_TwoStage_0.60_0.45.tif | 803149 | 118707 | 214   | 1451  | 0.871471 | 0.012076 | 0.023821 | 0.012054 |   |
| cht_TwoStage_0.60_0.50.tif | 803263 | 119544 | 100   | 614   | 0.859944 | 0.005511 | 0.01016  | 0.005106 |   |

|                            |        |        |        |        |          |          |          |          |
|----------------------------|--------|--------|--------|--------|----------|----------|----------|----------|
| cht_TwoStage_0.60_0.55.tif | 803297 | 119846 | 66     | 312    | 0.825397 | 0.002597 | 0.005177 | 0.002595 |
| cht_TwoStage_0.60_0.60.tif | 803363 | 120158 | 0      | 0      | 0        | 0        | 0        | 0        |
| cht_TwoStage_0.60_0.65.tif | 803363 | 120158 | 0      | 0      | 0        | 0        | 0        | 0        |
| cht_TwoStage_0.60_0.70.tif | 803363 | 120158 | 0      | 0      | 0        | 0        | 0        | 0        |
| cht_TwoStage_0.60_0.75.tif | 803363 | 120158 | 0      | 0      | 0        | 0        | 0        | 0        |
| cht_TwoStage_0.60_0.80.tif | 803363 | 120158 | 0      | 0      | 0        | 0        | 0        | 0        |
| cht_TwoStage_0.60_0.85.tif | 803363 | 120158 | 0      | 0      | 0        | 0        | 0        | 0        |
| cht_TwoStage_0.60_0.90.tif | 803363 | 120158 | 0      | 0      | 0        | 0        | 0        | 0        |
| cht_TwoStage_0.60_0.95.tif | 803363 | 120158 | 0      | 0      | 0        | 0        | 0        | 0        |
| cht_TwoStage_0.60_1.00.tif | 803363 | 120158 | 0      | 0      | 0        | 0        | 0        | 0        |
| cht_TwoStage_0.65_0.05.tif | 735170 | 15656  | 68193  | 104502 | 0.605125 | 0.869705 | 0.713682 | 0.554826 |
| cht_TwoStage_0.65_0.10.tif | 767623 | 34990  | 35740  | 85168  | 0.704403 | 0.7088   | 0.706595 | 0.546306 |
| cht_TwoStage_0.65_0.15.tif | 783717 | 60369  | 19646  | 59789  | 0.752678 | 0.497587 | 0.599109 | 0.427663 |
| cht_TwoStage_0.65_0.20.tif | 792067 | 77920  | 11296  | 42238  | 0.788994 | 0.35152  | 0.486355 | 0.321314 |
| cht_TwoStage_0.65_0.25.tif | 796400 | 90835  | 6963   | 29323  | 0.808108 | 0.244037 | 0.374869 | 0.23067  |
| cht_TwoStage_0.65_0.30.tif | 799250 | 101032 | 4113   | 19126  | 0.823013 | 0.159174 | 0.266756 | 0.153906 |
| cht_TwoStage_0.65_0.35.tif | 801717 | 110083 | 1646   | 10075  | 0.859568 | 0.083848 | 0.152792 | 0.082715 |
| cht_TwoStage_0.65_0.40.tif | 802420 | 114433 | 943    | 5725   | 0.858578 | 0.047646 | 0.090281 | 0.047275 |
| cht_TwoStage_0.65_0.45.tif | 802989 | 117414 | 374    | 2744   | 0.880051 | 0.022837 | 0.044518 | 0.022766 |
| cht_TwoStage_0.65_0.50.tif | 803194 | 119028 | 169    | 1130   | 0.8699   | 0.009404 | 0.018607 | 0.009391 |
| cht_TwoStage_0.65_0.55.tif | 803257 | 119554 | 106    | 604    | 0.850704 | 0.005027 | 0.009994 | 0.005022 |
| cht_TwoStage_0.65_0.60.tif | 803363 | 120158 | 0      | 0      | 0        | 0        | 0        | 0        |
| cht_TwoStage_0.65_0.65.tif | 803363 | 120158 | 0      | 0      | 0        | 0        | 0        | 0        |
| cht_TwoStage_0.65_0.70.tif | 803363 | 120158 | 0      | 0      | 0        | 0        | 0        | 0        |
| cht_TwoStage_0.65_0.75.tif | 803363 | 120158 | 0      | 0      | 0        | 0        | 0        | 0        |
| cht_TwoStage_0.65_0.80.tif | 803363 | 120158 | 0      | 0      | 0        | 0        | 0        | 0        |
| cht_TwoStage_0.65_0.85.tif | 803363 | 120158 | 0      | 0      | 0        | 0        | 0        | 0        |
| cht_TwoStage_0.65_0.90.tif | 803363 | 120158 | 0      | 0      | 0        | 0        | 0        | 0        |
| cht_TwoStage_0.65_0.95.tif | 803363 | 120158 | 0      | 0      | 0        | 0        | 0        | 0        |
| cht_TwoStage_0.65_1.00.tif | 803363 | 120158 | 0      | 0      | 0        | 0        | 0        | 0        |
| cht_TwoStage_0.70_0.05.tif | 720305 | 10117  | 83058  | 110041 | 0.569868 | 0.915803 | 0.702561 | 0.541498 |
| cht_TwoStage_0.70_0.10.tif | 760517 | 27533  | 42846  | 92625  | 0.683726 | 0.77086  | 0.724683 | 0.568238 |
| cht_TwoStage_0.70_0.15.tif | 779402 | 54611  | 23961  | 65547  | 0.732303 | 0.545507 | 0.625252 | 0.454812 |
| cht_TwoStage_0.70_0.20.tif | 788721 | 71863  | 14642  | 48295  | 0.767355 | 0.401929 | 0.52754  | 0.358272 |
| cht_TwoStage_0.70_0.25.tif | 794457 | 85204  | 8906   | 34954  | 0.796945 | 0.2909   | 0.426222 | 0.270827 |
| cht_TwoStage_0.70_0.30.tif | 797833 | 96288  | 5530   | 23870  | 0.811905 | 0.198655 | 0.319207 | 0.189915 |
| cht_TwoStage_0.70_0.35.tif | 800434 | 106560 | 2929   | 13598  | 0.822775 | 0.113168 | 0.198968 | 0.110475 |
| cht_TwoStage_0.70_0.40.tif | 801878 | 111996 | 1485   | 8162   | 0.846066 | 0.067927 | 0.125758 | 0.067098 |
| cht_TwoStage_0.70_0.45.tif | 802514 | 115760 | 849    | 4398   | 0.838193 | 0.036602 | 0.070141 | 0.036345 |
| cht_TwoStage_0.70_0.50.tif | 803028 | 117842 | 335    | 2316   | 0.873633 | 0.019275 | 0.037717 | 0.019221 |
| cht_TwoStage_0.70_0.55.tif | 803231 | 119460 | 132    | 698    | 0.840964 | 0.005809 | 0.011538 | 0.005803 |
| cht_TwoStage_0.70_0.60.tif | 803329 | 120017 | 34     | 141    | 0.805714 | 0.001173 | 0.002343 | 0.001173 |
| cht_TwoStage_0.70_0.65.tif | 803363 | 120158 | 0      | 0      | 0        | 0        | 0        | 0        |
| cht_TwoStage_0.70_0.70.tif | 803363 | 120158 | 0      | 0      | 0        | 0        | 0        | 0        |
| cht_TwoStage_0.70_0.75.tif | 803363 | 120158 | 0      | 0      | 0        | 0        | 0        | 0        |
| cht_TwoStage_0.70_0.80.tif | 803363 | 120158 | 0      | 0      | 0        | 0        | 0        | 0        |
| cht_TwoStage_0.70_0.85.tif | 803363 | 120158 | 0      | 0      | 0        | 0        | 0        | 0        |
| cht_TwoStage_0.70_0.90.tif | 803363 | 120158 | 0      | 0      | 0        | 0        | 0        | 0        |
| cht_TwoStage_0.70_0.95.tif | 803363 | 120158 | 0      | 0      | 0        | 0        | 0        | 0        |
| cht_TwoStage_0.70_1.00.tif | 803363 | 120158 | 0      | 0      | 0        | 0        | 0        | 0        |
| cht_TwoStage_0.75_0.05.tif | 704070 | 6487   | 99293  | 113671 | 0.533757 | 0.946013 | 0.682459 | 0.517979 |
| cht_TwoStage_0.75_0.10.tif | 752804 | 22349  | 50559  | 97809  | 0.659232 | 0.814003 | 0.728488 | 0.572931 |
| cht_TwoStage_0.75_0.15.tif | 772259 | 45728  | 31104  | 74430  | 0.70527  | 0.619434 | 0.659571 | 0.49206  |
| cht_TwoStage_0.75_0.20.tif | 783823 | 64722  | 19540  | 55436  | 0.739383 | 0.461359 | 0.568184 | 0.396827 |
| cht_TwoStage_0.75_0.25.tif | 790981 | 78413  | 12382  | 41745  | 0.771242 | 0.347418 | 0.479043 | 0.314962 |
| cht_TwoStage_0.75_0.30.tif | 795709 | 92520  | 7654   | 27638  | 0.783124 | 0.230014 | 0.355587 | 0.216239 |
| cht_TwoStage_0.75_0.35.tif | 798923 | 102064 | 4440   | 18094  | 0.802964 | 0.150585 | 0.253609 | 0.145219 |
| cht_TwoStage_0.75_0.40.tif | 800881 | 109062 | 2482   | 11096  | 0.817204 | 0.092345 | 0.165939 | 0.090476 |
| cht_TwoStage_0.75_0.45.tif | 802001 | 112804 | 1362   | 7354   | 0.843736 | 0.061203 | 0.114127 | 0.060517 |
| cht_TwoStage_0.75_0.50.tif | 802757 | 116100 | 606    | 4058   | 0.870069 | 0.033772 | 0.065021 | 0.033603 |
| cht_TwoStage_0.75_0.55.tif | 803107 | 118052 | 256    | 2106   | 0.891617 | 0.017527 | 0.034378 | 0.01749  |
| cht_TwoStage_0.75_0.60.tif | 803247 | 119408 | 116    | 750    | 0.866051 | 0.006242 | 0.012394 | 0.006236 |
| cht_TwoStage_0.75_0.65.tif | 803363 | 120158 | 0      | 0      | 0        | 0        | 0        | 0        |
| cht_TwoStage_0.75_0.70.tif | 803363 | 120158 | 0      | 0      | 0        | 0        | 0        | 0        |
| cht_TwoStage_0.75_0.75.tif | 803363 | 120158 | 0      | 0      | 0        | 0        | 0        | 0        |
| cht_TwoStage_0.75_0.80.tif | 803363 | 120158 | 0      | 0      | 0        | 0        | 0        | 0        |
| cht_TwoStage_0.75_0.85.tif | 803363 | 120158 | 0      | 0      | 0        | 0        | 0        | 0        |
| cht_TwoStage_0.75_0.90.tif | 803363 | 120158 | 0      | 0      | 0        | 0        | 0        | 0        |
| cht_TwoStage_0.75_0.95.tif | 803363 | 120158 | 0      | 0      | 0        | 0        | 0        | 0        |
| cht_TwoStage_0.75_1.00.tif | 803363 | 120158 | 0      | 0      | 0        | 0        | 0        | 0        |
| cht_TwoStage_0.80_0.05.tif | 682094 | 3726   | 121269 | 116432 | 0.489825 | 0.968991 | 0.650714 | 0.482266 |
| cht_TwoStage_0.80_0.10.tif | 739890 | 16015  | 63473  | 104143 | 0.621319 | 0.866717 | 0.723783 | 0.567132 |
| cht_TwoStage_0.80_0.15.tif | 765888 | 38552  | 37475  | 81606  | 0.685298 | 0.679156 | 0.682213 | 0.517696 |
| cht_TwoStage_0.80_0.20.tif | 777580 | 57096  | 25783  | 63062  | 0.709798 | 0.524826 | 0.603455 | 0.432106 |
| cht_TwoStage_0.80_0.25.tif | 787163 | 72403  | 16200  | 47755  | 0.746697 | 0.397435 | 0.518758 | 0.350218 |
| cht_TwoStage_0.80_0.30.tif | 792578 | 85051  | 10785  | 35107  | 0.764992 | 0.292174 | 0.422849 | 0.268109 |
| cht_TwoStage_0.80_0.35.tif | 795643 | 95556  | 7720   | 24602  | 0.761153 | 0.204747 | 0.322692 | 0.192386 |
| cht_TwoStage_0.80_0.40.tif | 799790 | 105135 | 3573   | 15023  | 0.807862 | 0.125027 | 0.216542 | 0.121417 |
| cht_TwoStage_0.80_0.45.tif | 801406 | 110345 | 1957   | 9813   | 0.83373  | 0.081667 | 0.148763 | 0.080359 |
| cht_TwoStage_0.80_0.50.tif | 802262 | 114076 | 1101   | 6082   | 0.846721 | 0.050617 | 0.095523 | 0.050157 |

|                            |        |        |        |        |          |          |          |          |
|----------------------------|--------|--------|--------|--------|----------|----------|----------|----------|
| cht_TwoStage_0.80_0.55.tif | 802869 | 116526 | 494    | 3632   | 0.880271 | 0.030227 | 0.058447 | 0.030103 |
| cht_TwoStage_0.80_0.60.tif | 803156 | 118332 | 207    | 1826   | 0.89818  | 0.015197 | 0.029888 | 0.015171 |
| cht_TwoStage_0.80_0.65.tif | 803229 | 119298 | 134    | 860    | 0.865191 | 0.007157 | 0.014197 | 0.007149 |
| cht_TwoStage_0.80_0.70.tif | 803350 | 119916 | 13     | 242    | 0.94902  | 0.002014 | 0.004019 | 0.002014 |
| cht_TwoStage_0.80_0.75.tif | 803363 | 120158 | 0      | 0      | 0        | 0        | 0        | 0        |
| cht_TwoStage_0.80_0.80.tif | 803363 | 120158 | 0      | 0      | 0        | 0        | 0        | 0        |
| cht_TwoStage_0.80_0.85.tif | 803363 | 120158 | 0      | 0      | 0        | 0        | 0        | 0        |
| cht_TwoStage_0.80_0.90.tif | 803363 | 120158 | 0      | 0      | 0        | 0        | 0        | 0        |
| cht_TwoStage_0.80_0.95.tif | 803363 | 120158 | 0      | 0      | 0        | 0        | 0        | 0        |
| cht_TwoStage_0.80_1.00.tif | 803363 | 120158 | 0      | 0      | 0        | 0        | 0        | 0        |
| cht_TwoStage_0.85_0.05.tif | 659730 | 2037   | 143633 | 118121 | 0.451267 | 0.983047 | 0.618577 | 0.447783 |
| cht_TwoStage_0.85_0.10.tif | 723190 | 11134  | 80173  | 109024 | 0.576246 | 0.907339 | 0.704847 | 0.544219 |
| cht_TwoStage_0.85_0.15.tif | 756472 | 30781  | 46891  | 89377  | 0.655891 | 0.743829 | 0.697098 | 0.535035 |
| cht_TwoStage_0.85_0.20.tif | 771477 | 50233  | 31886  | 69925  | 0.686812 | 0.581942 | 0.630043 | 0.4599   |
| cht_TwoStage_0.85_0.25.tif | 780831 | 65548  | 22532  | 54610  | 0.707915 | 0.454485 | 0.553573 | 0.382718 |
| cht_TwoStage_0.85_0.30.tif | 787980 | 78197  | 15383  | 41961  | 0.731742 | 0.349215 | 0.472795 | 0.309582 |
| cht_TwoStage_0.85_0.35.tif | 792921 | 89793  | 10442  | 30365  | 0.744113 | 0.252709 | 0.377287 | 0.232504 |
| cht_TwoStage_0.85_0.40.tif | 796876 | 99859  | 6487   | 20299  | 0.757821 | 0.168936 | 0.276282 | 0.160283 |
| cht_TwoStage_0.85_0.45.tif | 799846 | 106653 | 3517   | 13505  | 0.793385 | 0.112394 | 0.196895 | 0.109197 |
| cht_TwoStage_0.85_0.50.tif | 801475 | 111122 | 1888   | 9036   | 0.82717  | 0.075201 | 0.137868 | 0.074038 |
| cht_TwoStage_0.85_0.55.tif | 802165 | 114476 | 1198   | 5682   | 0.825872 | 0.047288 | 0.089454 | 0.046821 |
| cht_TwoStage_0.85_0.60.tif | 802933 | 117211 | 430    | 2947   | 0.872668 | 0.024526 | 0.047711 | 0.024439 |
| cht_TwoStage_0.85_0.65.tif | 803163 | 118273 | 200    | 1885   | 0.904077 | 0.015688 | 0.03084  | 0.015662 |
| cht_TwoStage_0.85_0.70.tif | 803242 | 119190 | 121    | 968    | 0.888889 | 0.008056 | 0.015967 | 0.008048 |
| cht_TwoStage_0.85_0.75.tif | 803316 | 119763 | 47     | 395    | 0.893665 | 0.003287 | 0.006551 | 0.003286 |
| cht_TwoStage_0.85_0.80.tif | 803351 | 120038 | 12     | 120    | 0.909091 | 0.000999 | 0.001995 | 0.000999 |
| cht_TwoStage_0.85_0.85.tif | 803363 | 120158 | 0      | 0      | 0        | 0        | 0        | 0        |
| cht_TwoStage_0.85_0.90.tif | 803363 | 120158 | 0      | 0      | 0        | 0        | 0        | 0        |
| cht_TwoStage_0.85_0.95.tif | 803363 | 120158 | 0      | 0      | 0        | 0        | 0        | 0        |
| cht_TwoStage_0.85_1.00.tif | 803363 | 120158 | 0      | 0      | 0        | 0        | 0        | 0        |
| cht_TwoStage_0.90_0.05.tif | 617396 | 813    | 185967 | 119345 | 0.390895 | 0.993234 | 0.561003 | 0.389857 |
| cht_TwoStage_0.90_0.10.tif | 694201 | 5729   | 109162 | 114429 | 0.511778 | 0.952321 | 0.665771 | 0.498993 |
| cht_TwoStage_0.90_0.15.tif | 736646 | 23322  | 66717  | 96836  | 0.592077 | 0.805906 | 0.682638 | 0.518186 |
| cht_TwoStage_0.90_0.20.tif | 759352 | 43054  | 44011  | 77104  | 0.636618 | 0.641688 | 0.639143 | 0.469662 |
| cht_TwoStage_0.90_0.25.tif | 772216 | 58308  | 31147  | 61850  | 0.665075 | 0.514739 | 0.580329 | 0.408777 |
| cht_TwoStage_0.90_0.30.tif | 781928 | 71599  | 21435  | 48559  | 0.693759 | 0.404126 | 0.510739 | 0.342948 |
| cht_TwoStage_0.90_0.35.tif | 786921 | 82646  | 16442  | 37512  | 0.695259 | 0.312189 | 0.430895 | 0.274612 |
| cht_TwoStage_0.90_0.40.tif | 792509 | 93212  | 10854  | 26946  | 0.712857 | 0.224255 | 0.341179 | 0.205676 |
| cht_TwoStage_0.90_0.45.tif | 796927 | 101151 | 6436   | 19007  | 0.747042 | 0.158183 | 0.261083 | 0.150141 |
| cht_TwoStage_0.90_0.50.tif | 799650 | 107335 | 3713   | 12823  | 0.77546  | 0.106718 | 0.187616 | 0.103519 |
| cht_TwoStage_0.90_0.55.tif | 801063 | 111729 | 2300   | 8429   | 0.785628 | 0.070149 | 0.128798 | 0.068832 |
| cht_TwoStage_0.90_0.60.tif | 802343 | 115336 | 1020   | 4822   | 0.825402 | 0.04013  | 0.07654  | 0.039793 |
| cht_TwoStage_0.90_0.65.tif | 802712 | 117639 | 651    | 2519   | 0.794637 | 0.020964 | 0.04085  | 0.020851 |
| cht_TwoStage_0.90_0.70.tif | 802928 | 118713 | 435    | 1445   | 0.768617 | 0.012026 | 0.023681 | 0.011982 |
| cht_TwoStage_0.90_0.75.tif | 803242 | 119231 | 121    | 927    | 0.884542 | 0.007715 | 0.015296 | 0.007707 |
| cht_TwoStage_0.90_0.80.tif | 803323 | 119840 | 40     | 318    | 0.888268 | 0.002647 | 0.005277 | 0.002646 |
| cht_TwoStage_0.90_0.85.tif | 803363 | 120158 | 0      | 0      | 0        | 0        | 0        | 0        |
| cht_TwoStage_0.90_0.90.tif | 803363 | 120158 | 0      | 0      | 0        | 0        | 0        | 0        |
| cht_TwoStage_0.90_0.95.tif | 803363 | 120158 | 0      | 0      | 0        | 0        | 0        | 0        |
| cht_TwoStage_0.90_1.00.tif | 803363 | 120158 | 0      | 0      | 0        | 0        | 0        | 0        |
| cht_TwoStage_0.95_0.05.tif | 551045 | 166    | 252318 | 119992 | 0.322291 | 0.998618 | 0.487309 | 0.322147 |
| cht_TwoStage_0.95_0.10.tif | 633017 | 2193   | 170346 | 117965 | 0.409159 | 0.981749 | 0.577596 | 0.40607  |
| cht_TwoStage_0.95_0.15.tif | 690361 | 13582  | 113002 | 106576 | 0.485367 | 0.886965 | 0.627405 | 0.457094 |
| cht_TwoStage_0.95_0.20.tif | 729255 | 33288  | 74108  | 86870  | 0.539639 | 0.722965 | 0.617993 | 0.44717  |
| cht_TwoStage_0.95_0.25.tif | 753140 | 49126  | 50223  | 71032  | 0.585807 | 0.591155 | 0.588469 | 0.416901 |
| cht_TwoStage_0.95_0.30.tif | 768568 | 62119  | 34795  | 58039  | 0.625191 | 0.483022 | 0.544988 | 0.374559 |
| cht_TwoStage_0.95_0.35.tif | 779439 | 74810  | 23924  | 45348  | 0.654637 | 0.377403 | 0.478784 | 0.314737 |
| cht_TwoStage_0.95_0.40.tif | 785192 | 85381  | 18171  | 34777  | 0.656814 | 0.289427 | 0.4018   | 0.251408 |
| cht_TwoStage_0.95_0.45.tif | 790193 | 93106  | 13170  | 27052  | 0.672567 | 0.225137 | 0.337349 | 0.202898 |
| cht_TwoStage_0.95_0.50.tif | 794337 | 100902 | 9026   | 19256  | 0.680857 | 0.160256 | 0.259445 | 0.149059 |
| cht_TwoStage_0.95_0.55.tif | 797698 | 108342 | 5665   | 11816  | 0.675934 | 0.098337 | 0.171696 | 0.09391  |
| cht_TwoStage_0.95_0.60.tif | 800428 | 112382 | 2935   | 7776   | 0.725983 | 0.064715 | 0.118836 | 0.063172 |
| cht_TwoStage_0.95_0.65.tif | 801286 | 114609 | 2077   | 5549   | 0.727642 | 0.046181 | 0.08685  | 0.045396 |
| cht_TwoStage_0.95_0.70.tif | 802555 | 117577 | 808    | 2581   | 0.761582 | 0.02148  | 0.041782 | 0.021337 |
| cht_TwoStage_0.95_0.75.tif | 802873 | 118450 | 490    | 1708   | 0.77707  | 0.014215 | 0.027919 | 0.014157 |
| cht_TwoStage_0.95_0.80.tif | 803155 | 119040 | 208    | 1118   | 0.843137 | 0.009304 | 0.018406 | 0.009288 |
| cht_TwoStage_0.95_0.85.tif | 803346 | 120021 | 17     | 137    | 0.88961  | 0.00114  | 0.002277 | 0.00114  |
| cht_TwoStage_0.95_0.90.tif | 803363 | 120158 | 0      | 0      | 0        | 0        | 0        | 0        |
| cht_TwoStage_0.95_0.95.tif | 803363 | 120158 | 0      | 0      | 0        | 0        | 0        | 0        |
| cht_TwoStage_0.95_1.00.tif | 803363 | 120158 | 0      | 0      | 0        | 0        | 0        | 0        |
| cht_TwoStage_1.00_0.05.tif | 172417 | 2      | 630946 | 120156 | 0.159973 | 0.999983 | 0.275821 | 0.159973 |
| cht_TwoStage_1.00_0.10.tif | 279861 | 3      | 523502 | 120155 | 0.186676 | 0.999975 | 0.314618 | 0.186675 |
| cht_TwoStage_1.00_0.15.tif | 457279 | 2336   | 346084 | 117822 | 0.253978 | 0.980559 | 0.403456 | 0.252706 |
| cht_TwoStage_1.00_0.20.tif | 578944 | 14027  | 224419 | 106131 | 0.321074 | 0.883262 | 0.470952 | 0.308004 |
| cht_TwoStage_1.00_0.25.tif | 639708 | 29184  | 163655 | 90974  | 0.357281 | 0.757112 | 0.48547  | 0.320542 |
| cht_TwoStage_1.00_0.30.tif | 682020 | 39630  | 121343 | 80528  | 0.398908 | 0.670184 | 0.500129 | 0.333448 |
| cht_TwoStage_1.00_0.35.tif | 716227 | 52061  | 87136  | 68097  | 0.438676 | 0.566729 | 0.494548 | 0.328504 |
| cht_TwoStage_1.00_0.40.tif | 743784 | 65948  | 59579  | 54210  | 0.476408 | 0.451156 | 0.463438 | 0.301607 |
| cht_TwoStage_1.00_0.45.tif | 759585 | 77346  | 43778  | 42812  | 0.494422 | 0.356298 | 0.414147 | 0.261151 |
| cht_TwoStage_1.00_0.50.tif | 769106 | 86501  | 34257  | 33657  | 0.495583 | 0.280106 | 0.357916 | 0.217965 |



|                            |        |        |       |       |          |          |          |          |
|----------------------------|--------|--------|-------|-------|----------|----------|----------|----------|
| cht_TwoStage_1.00_0.55.tif | 782201 | 95311  | 21162 | 24847 | 0.540047 | 0.206786 | 0.299061 | 0.175821 |
| cht_TwoStage_1.00_0.60.tif | 785364 | 102906 | 17999 | 17252 | 0.489405 | 0.143578 | 0.222021 | 0.124872 |
| cht_TwoStage_1.00_0.65.tif | 790455 | 108609 | 12908 | 11549 | 0.472217 | 0.096115 | 0.159721 | 0.086792 |
| cht_TwoStage_1.00_0.70.tif | 794598 | 112099 | 8765  | 8059  | 0.479018 | 0.06707  | 0.117665 | 0.06251  |
| cht_TwoStage_1.00_0.75.tif | 797533 | 114032 | 5830  | 6126  | 0.512379 | 0.050983 | 0.092738 | 0.048624 |
| cht_TwoStage_1.00_0.80.tif | 800908 | 116997 | 2455  | 3161  | 0.562856 | 0.026307 | 0.050265 | 0.02578  |
| cht_TwoStage_1.00_0.85.tif | 801612 | 117942 | 1751  | 2216  | 0.558609 | 0.018442 | 0.035706 | 0.018177 |
| cht_TwoStage_1.00_0.90.tif | 802947 | 119613 | 416   | 545   | 0.567118 | 0.004536 | 0.008999 | 0.00452  |
| cht_TwoStage_1.00_0.95.tif | 802913 | 119749 | 450   | 409   | 0.476135 | 0.003404 | 0.006759 | 0.003391 |
| cht_TwoStage_1.00_1.00.tif | 803363 | 120158 | 0     | 0     | 0        | 0        | 0        | 0        |

# Supplementary Figure 1

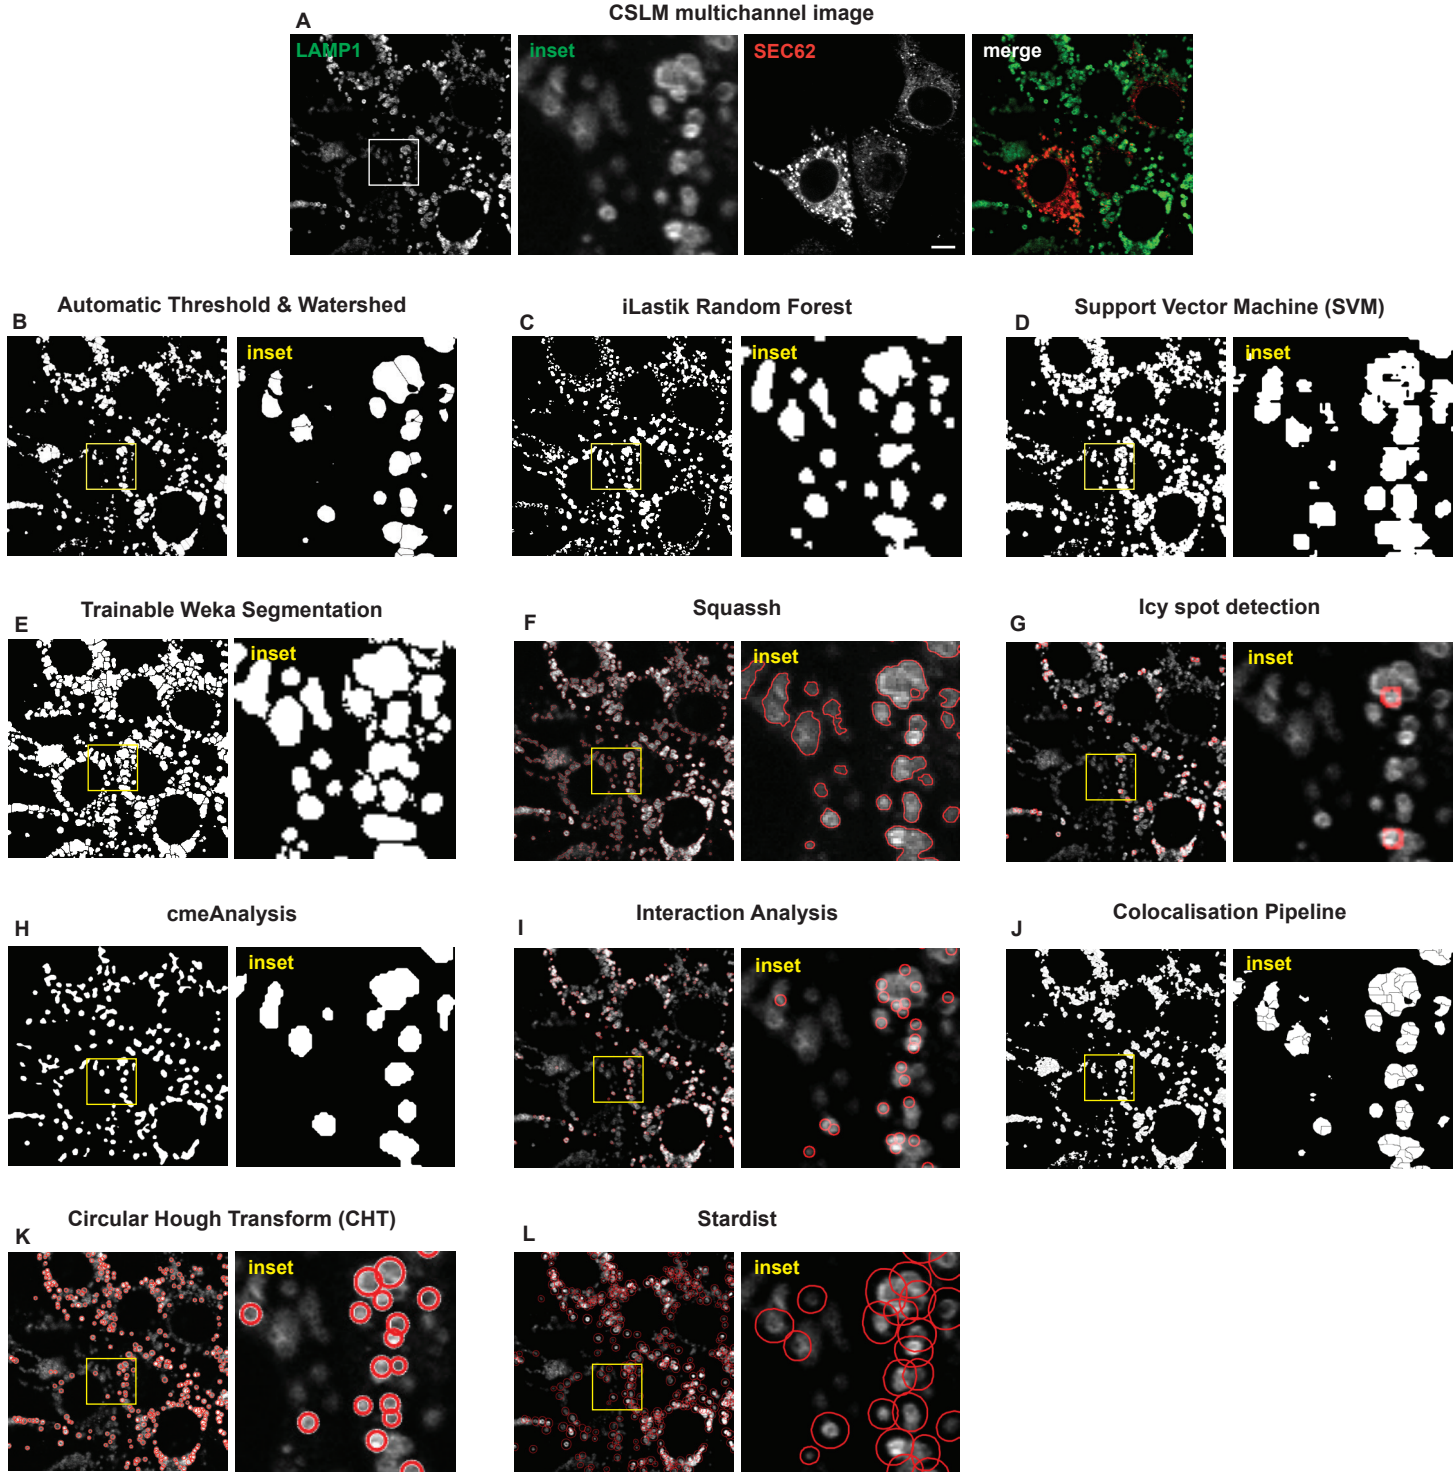

# Supplementary Figure 2

A

Segmentation

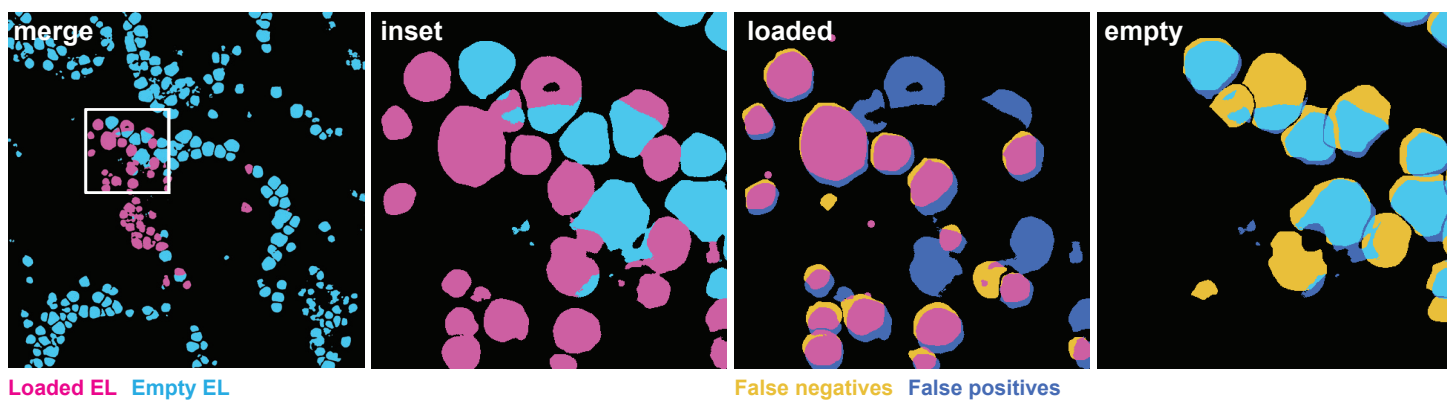

B

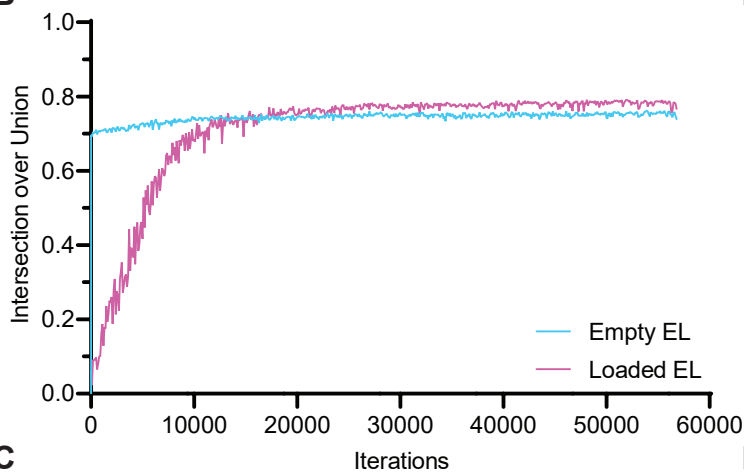

D

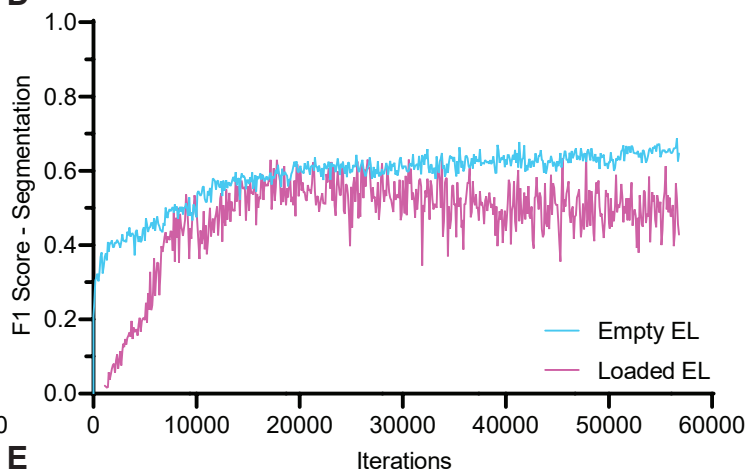

C

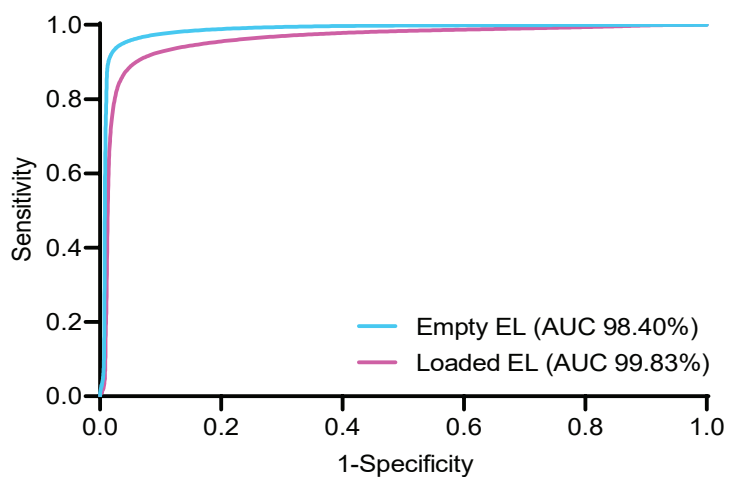

E

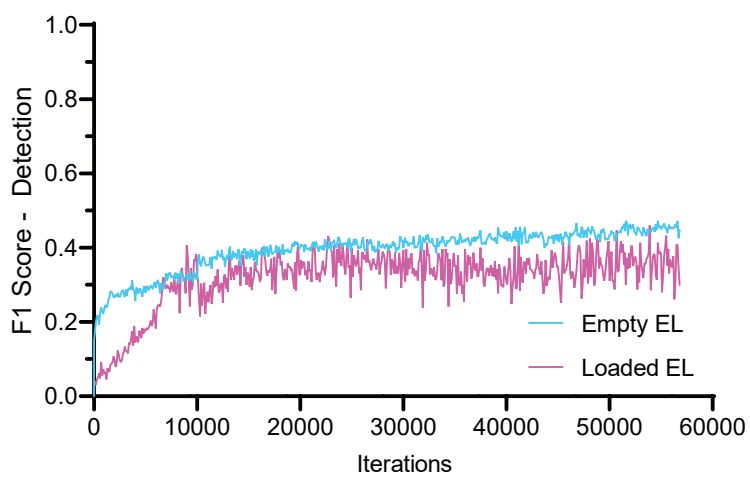

# Supplementary figure 3

**A**

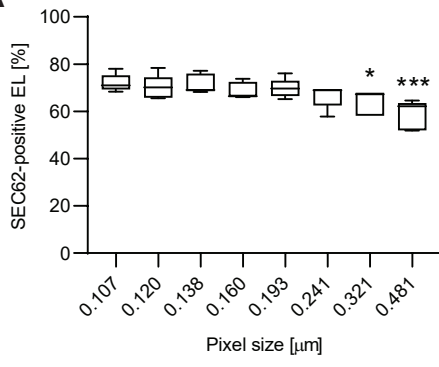

**B**

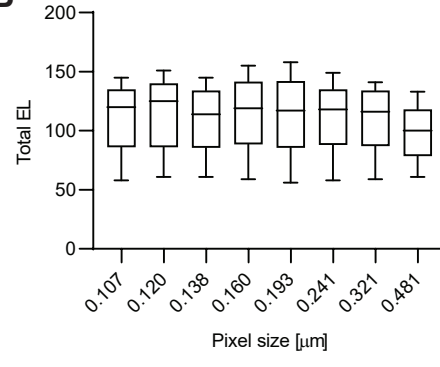

**C**

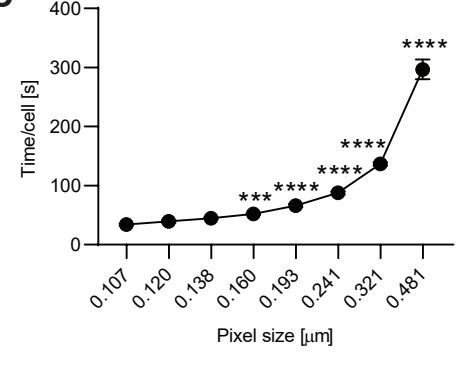

## Supplementary figure 4

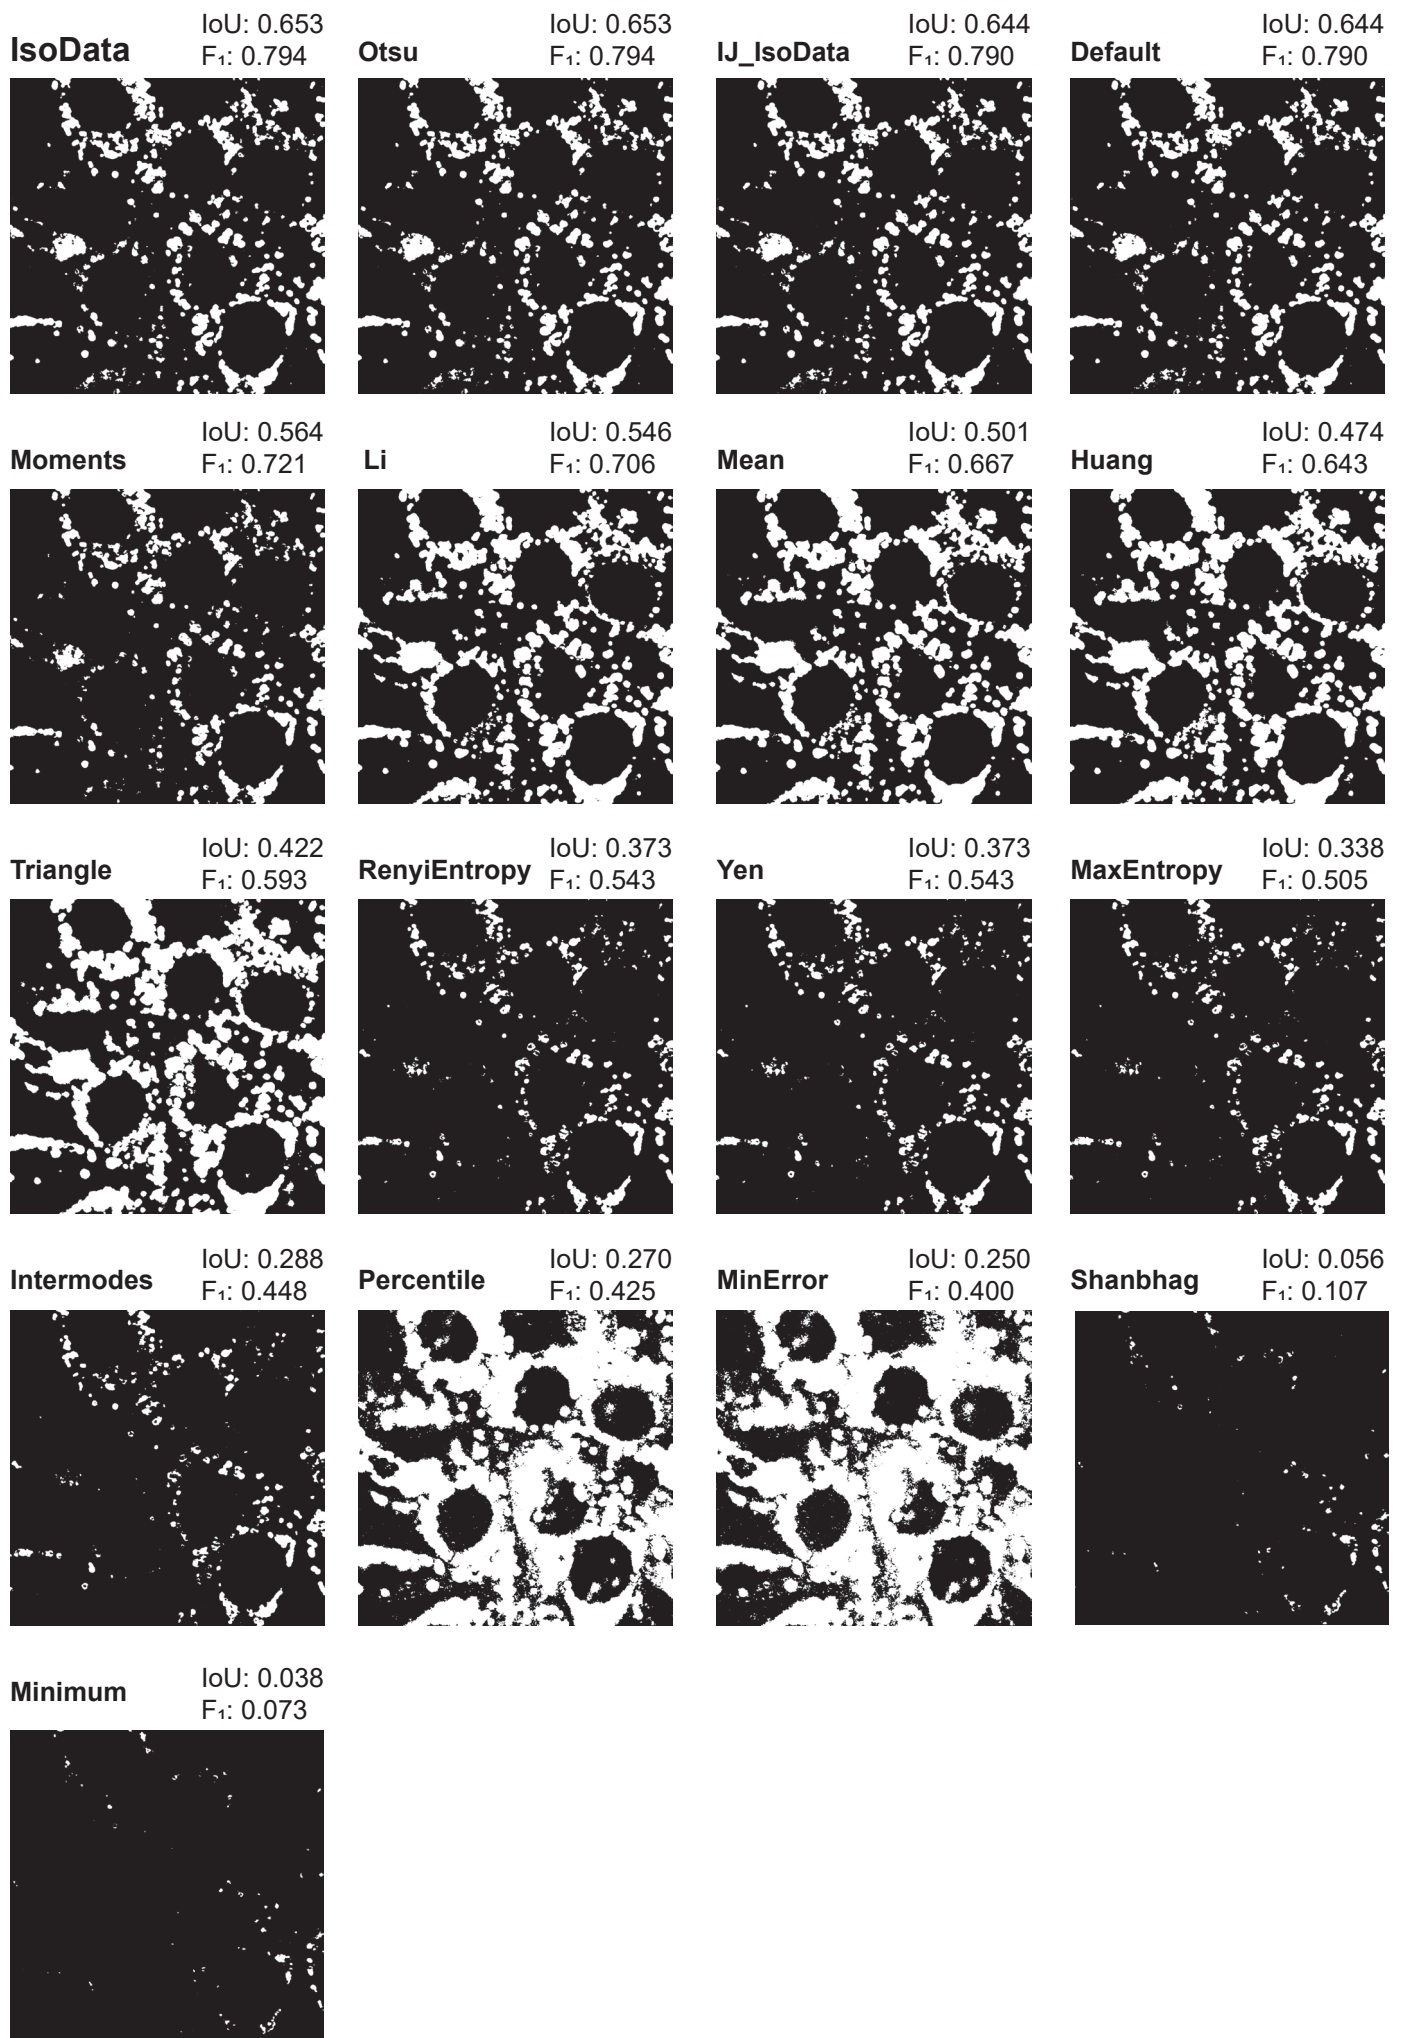

Supplement: mbc-31-1512-s001.pdf [file mbc-31-1512-s001.pdf]
